# Supplementary material for: Secopaxilline A, an indole-diterpenoid derivative from an aciduric Penicillium fungus, its identification and semisynthesis
Source: Royal Society of Chemistry journal article supplement (doi:10.1039/c8qo00756j), 2018-01-01

## Supplementary Information

### Secopaxilline A, an Indole-Diterpenoid Alkaloid from an Aciduric

### *Penicillium* fungus, its Identification and Semisynthesis

Yaqin Fan,<sup>a</sup> Yi Wang,<sup>a</sup> Peng Fu,<sup>\*,a,b</sup> Arthit Chairoungdua,<sup>c</sup> Pawinee Piyachaturawat,<sup>c</sup> and Weiming Zhu<sup>\*,a,b</sup>

<sup>a</sup> Key Laboratory of Marine Drugs, Ministry of Education of China, School of Medicine and Pharmacy, Ocean University of China, Qingdao 266003, China

<sup>b</sup> Laboratory for Marine Drugs and Bioproducts of Qingdao National Laboratory for Marine Science and Technology, Qingdao 266003, China

<sup>c</sup> Department of Physiology, Faculty of Science, Mahidol University, Bangkok 10400, Thailand

#### List of Supporting Information

---

|                                                                                                                                      |     |
|--------------------------------------------------------------------------------------------------------------------------------------|-----|
| <b>Figure S1.</b> ECD spectrum of secopaxilline A ( <b>1</b> ) .....                                                                 | S2  |
| <b>Figure S2.</b> HPLC traces for reaction mixtures of paxilline.....                                                                | S2  |
| <b>Figure S3.</b> ESIMS spectrum of compound <b>2</b> .....                                                                          | S3  |
| <b>Figure S4.</b> HPLC traces for one-pot synthesis of deacetylsecopaxilline A ( <b>4</b> ) from paxilline.....                      | S3  |
| <b>Figure S5.</b> HRESIMS spectrum of secopaxilline A ( <b>1</b> ) .....                                                             | S4  |
| <b>Figure S6.</b> <sup>1</sup> H-NMR spectrum of secopaxilline A ( <b>1</b> ) in DMSO- <i>d</i> <sub>6</sub> .....                   | S5  |
| <b>Figure S7.</b> <sup>13</sup> C-NMR spectrum of secopaxilline A ( <b>1</b> ) in DMSO- <i>d</i> <sub>6</sub> .....                  | S6  |
| <b>Figure S8.</b> DEPT spectrum of secopaxilline A ( <b>1</b> ) in DMSO- <i>d</i> <sub>6</sub> .....                                 | S7  |
| <b>Figure S9.</b> HSQC spectrum of secopaxilline A ( <b>1</b> ) in DMSO- <i>d</i> <sub>6</sub> .....                                 | S8  |
| <b>Figure S10.</b> <sup>1</sup> H- <sup>1</sup> H COSY spectrum of secopaxilline A ( <b>1</b> ) in DMSO- <i>d</i> <sub>6</sub> ..... | S9  |
| <b>Figure S11.</b> HMBC spectrum of secopaxilline A ( <b>1</b> ) in DMSO- <i>d</i> <sub>6</sub> .....                                | S10 |
| <b>Figure S12.</b> NOESY spectrum of secopaxilline A ( <b>1</b> ) in DMSO- <i>d</i> <sub>6</sub> .....                               | S11 |
| <b>Figure S13.</b> HRESIMS spectrum of deacetylsecopaxilline A ( <b>4</b> ) .....                                                    | S12 |
| <b>Figure S14.</b> <sup>1</sup> H-NMR spectrum of deacetylsecopaxilline A ( <b>4</b> ) in DMSO- <i>d</i> <sub>6</sub> .....          | S13 |

**Figure S15.**  $^{13}\text{C}$ -NMR spectrum of deacetylsecopaxilline A (4) in  $\text{DMSO-}d_6$ .....S14

**Figure S16.** HSQC spectrum of deacetylsecopaxilline A (4) in  $\text{DMSO-}d_6$ .....S15

**Figure S17.**  $^1\text{H-}^1\text{H}$  COSY spectrum of deacetylsecopaxilline A (4) in  $\text{DMSO-}d_6$ .....S16

**Figure S18.** HMBC spectrum of deacetylsecopaxilline A (4) in  $\text{DMSO-}d_6$ .....S17

**Figure S19.** NOESY spectrum of deacetylsecopaxilline A (4) in  $\text{DMSO-}d_6$ .....S18

**Figure S20.** Comparison of the  $^1\text{H}$ -NMR of the isolated and synthetic secopaxilline A (1) .....S19

**Figure S21.** UV spectrum of secopaxilline A (1) and deacetylsecopaxilline A (4) .....S20

**Figure S22.** IR spectrum of secopaxilline A (1) .....S21

**Figure S23.** IR spectrum of deacetylsecopaxilline A (4) .....S22

**Figure S1.** ECD spectrum of secopaxilline A (1)

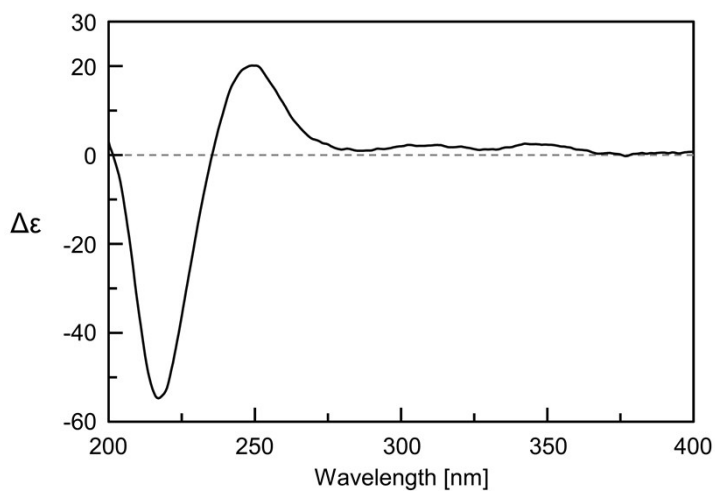

**Figure S2.** HPLC traces for reaction mixtures of paxilline  
paxilline

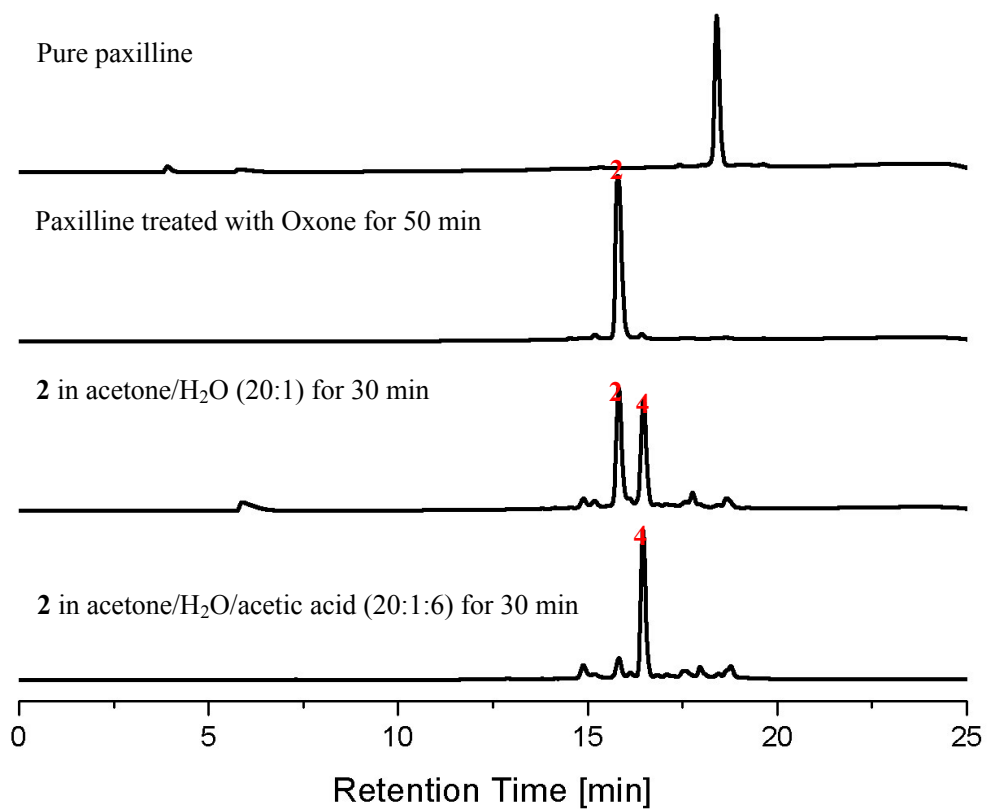

**Figure S3.** ESIMS spectrum of compound **2**

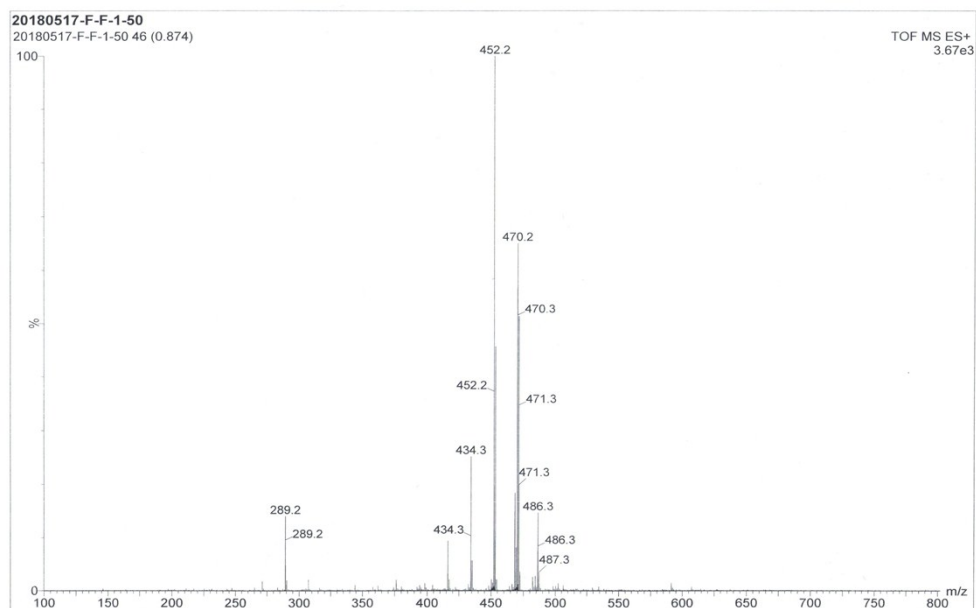

**Figure S4.** HPLC traces for one-pot synthesis of deacetylsecopaxilline A (**4**) from paxilline

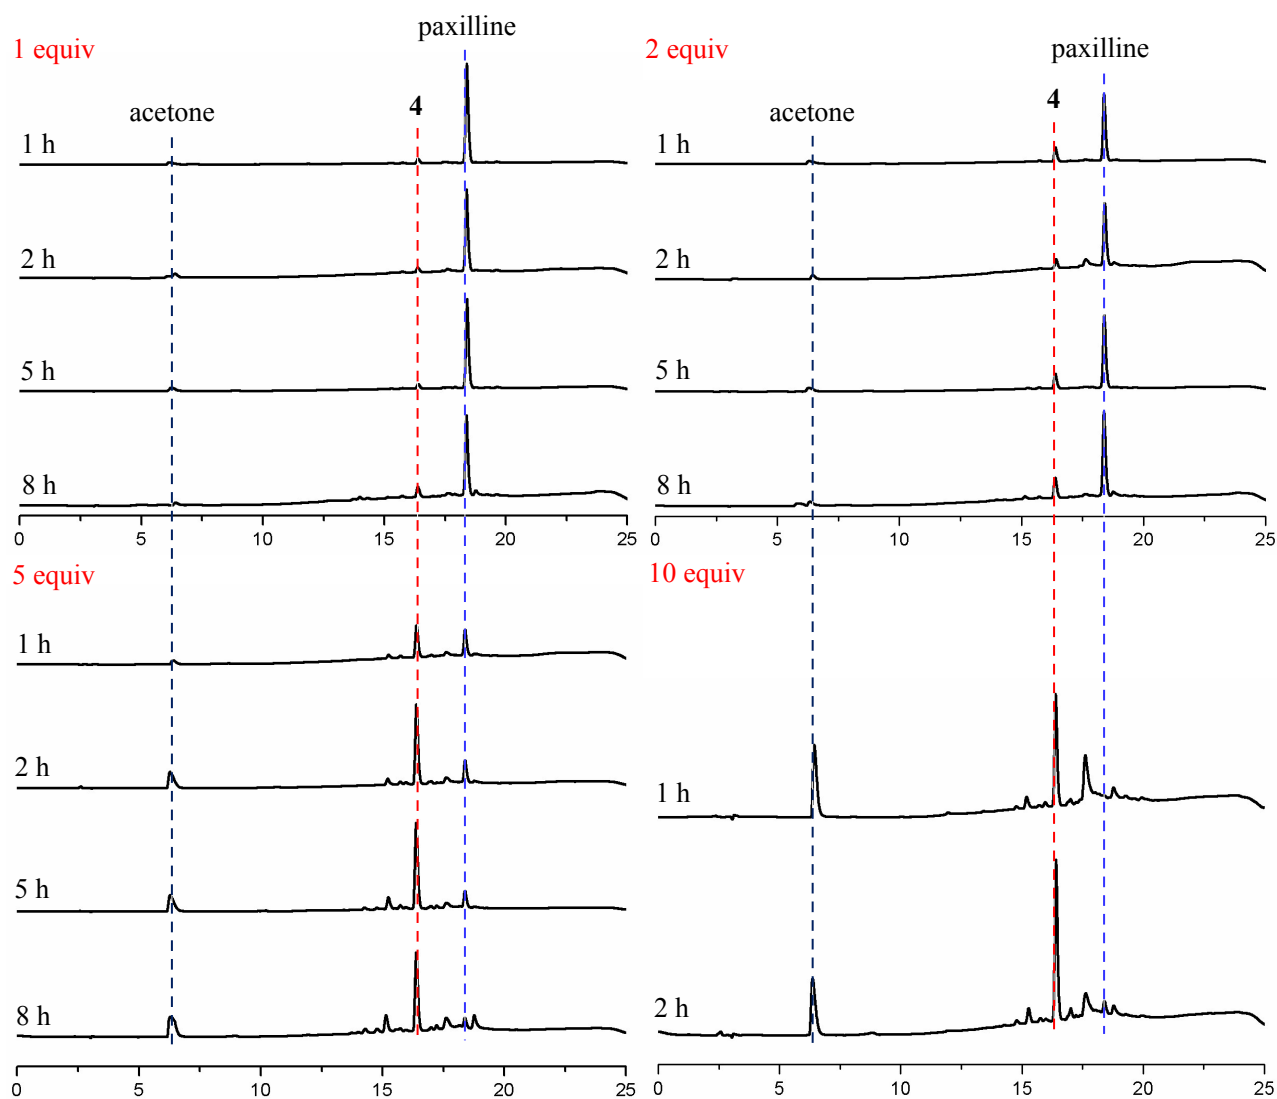

**Figure S5.** HRESIMS spectrum of secopaxilline A (**1**)

20180326-fyq-7-115\_180326152834

3/26/2018 4:26:32 PM

fyq-7-115

20180326-fyq-7-115\_180326152834 #55-56 RT: 0.44-0.44 AV: 2 NL: 7.38E7

T: FTMS + p ESI Full ms [100.00-2000.00]

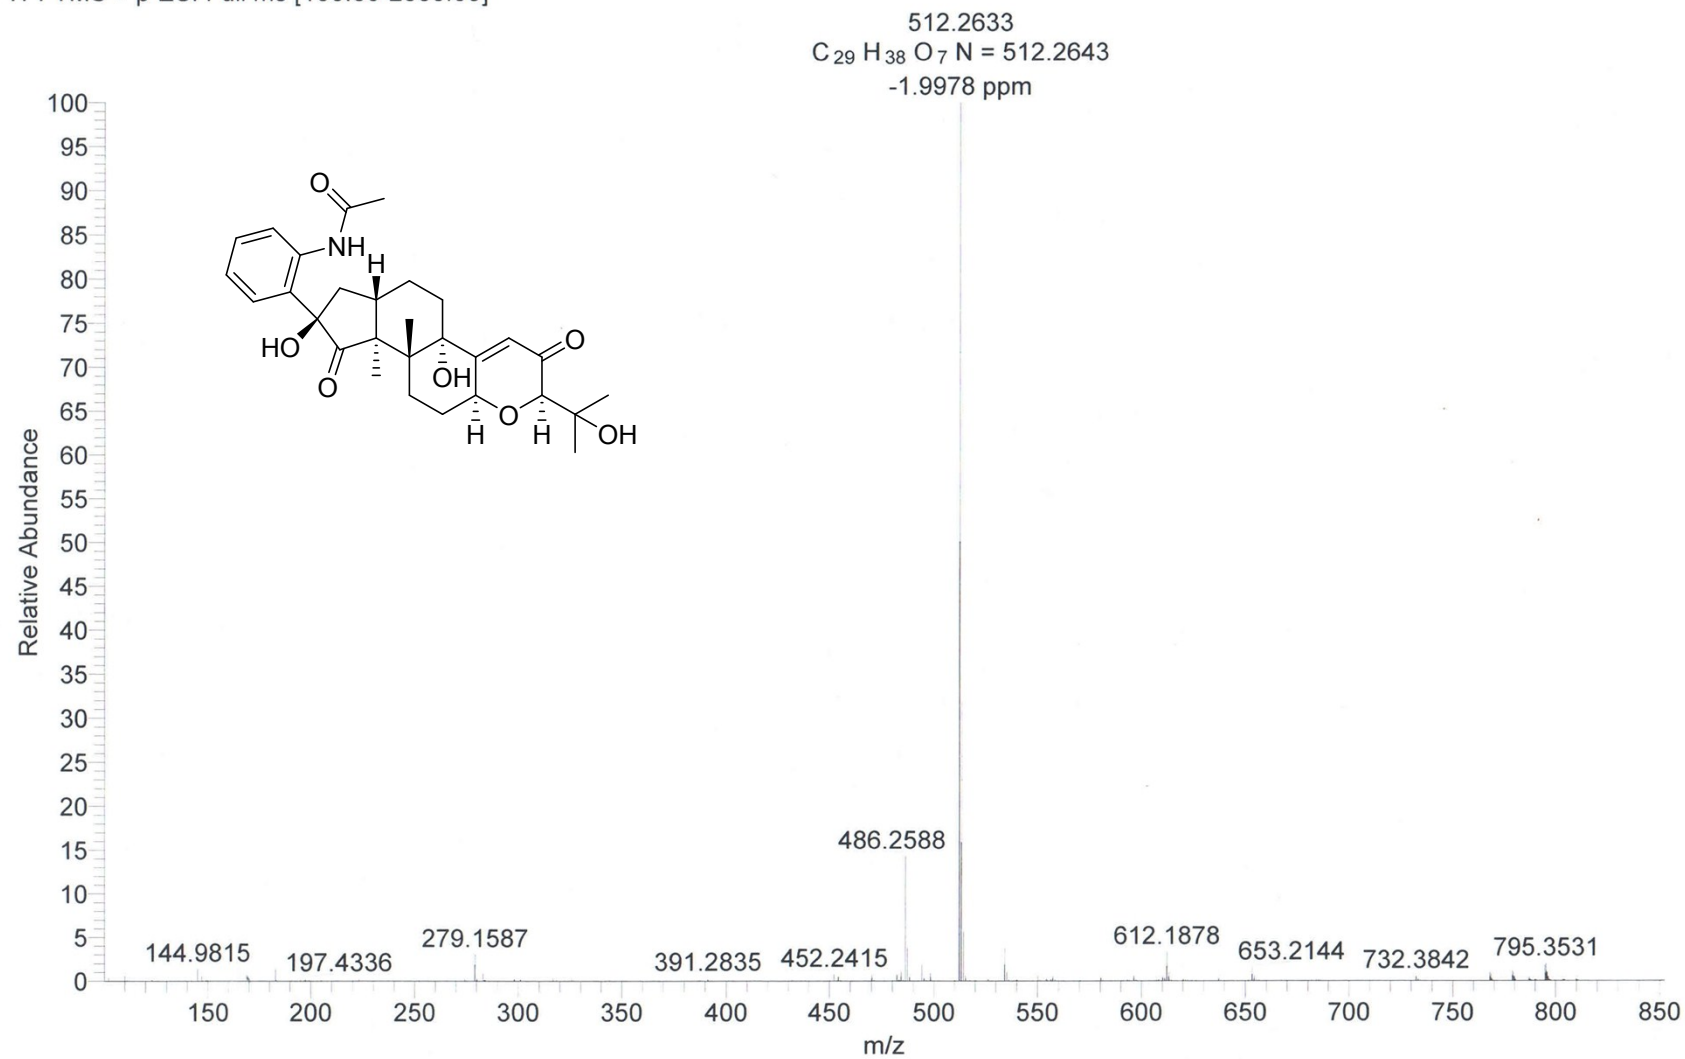

Figure S6. <sup>1</sup>H-NMR spectrum of secopaxilline A (**1**) in DMSO-*d*<sub>6</sub>

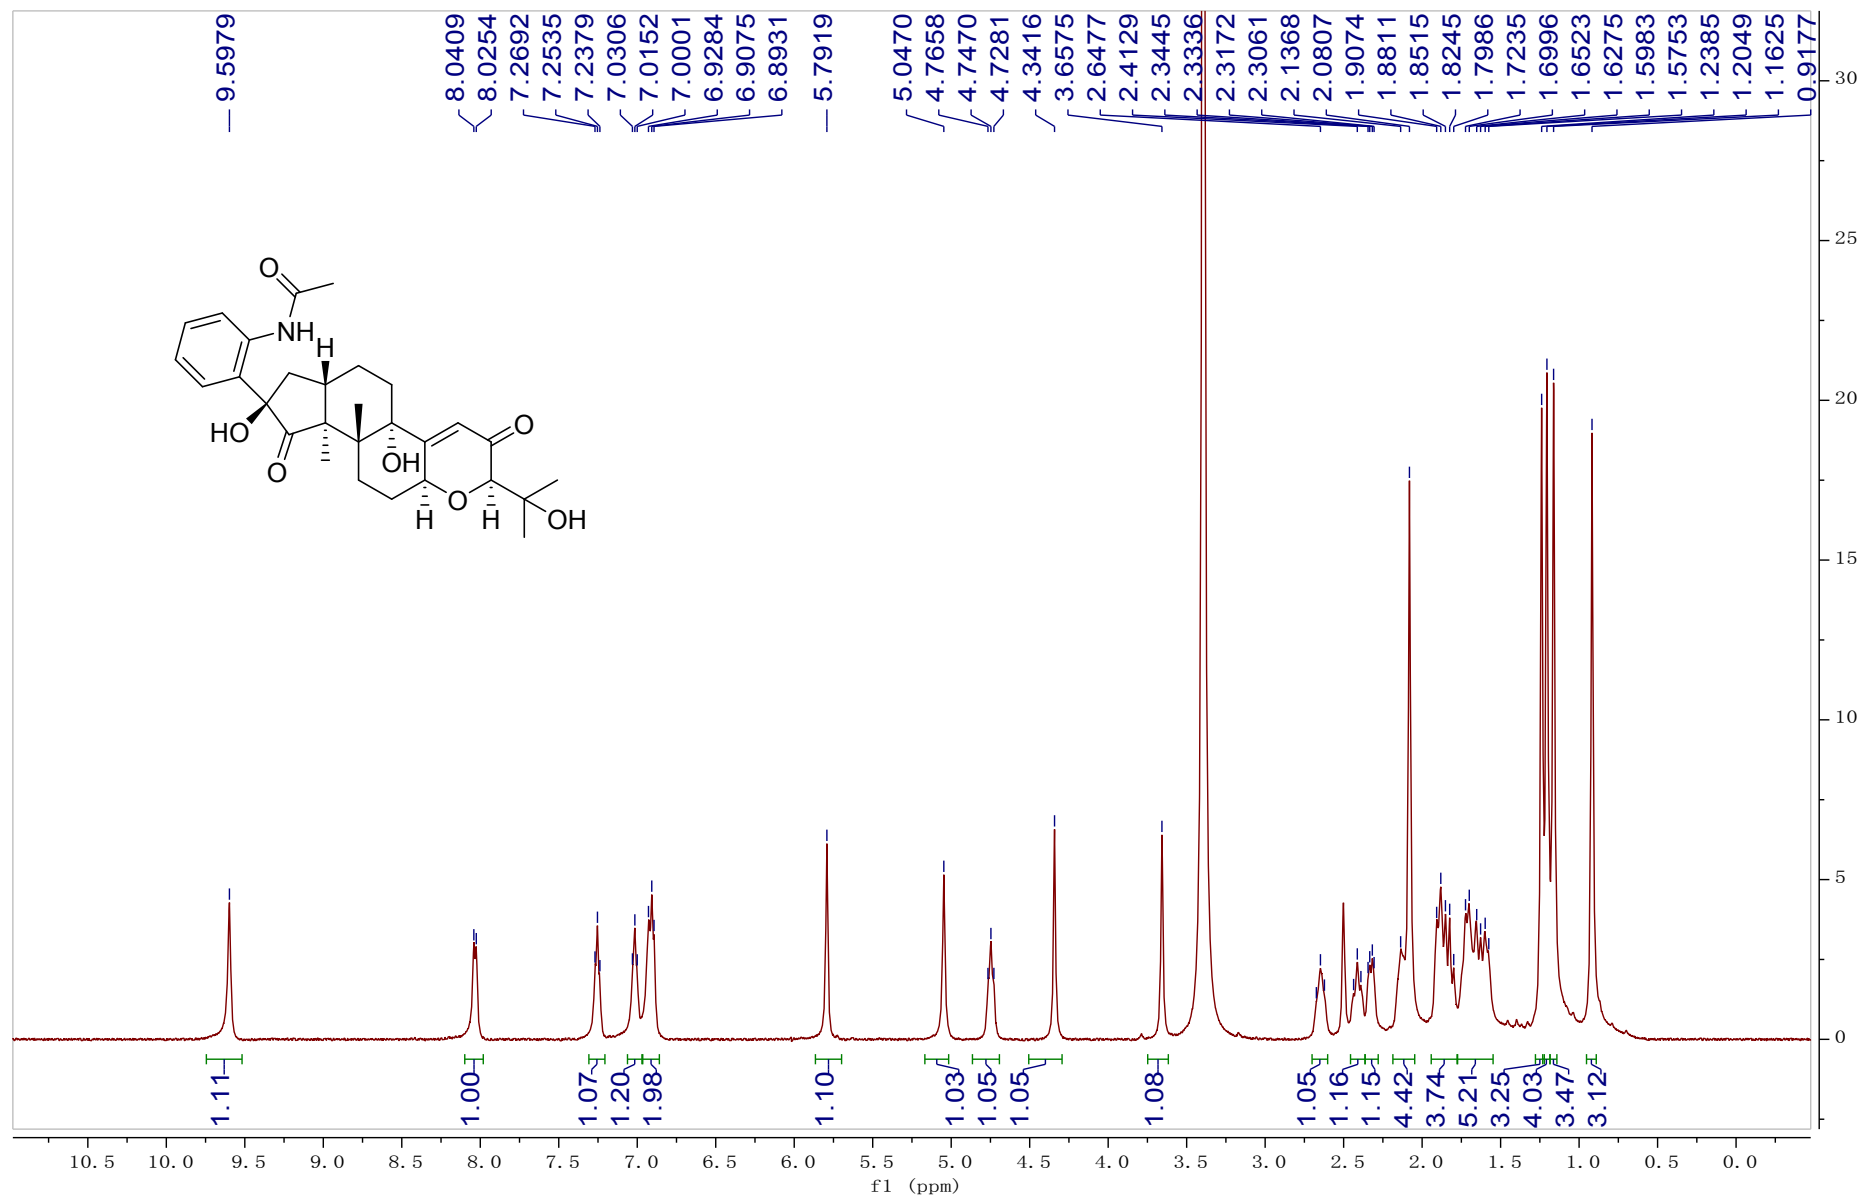

Figure S7.  $^{13}\text{C}$ -NMR spectrum of secopaxilline A (**1**) in  $\text{DMSO-}d_6$

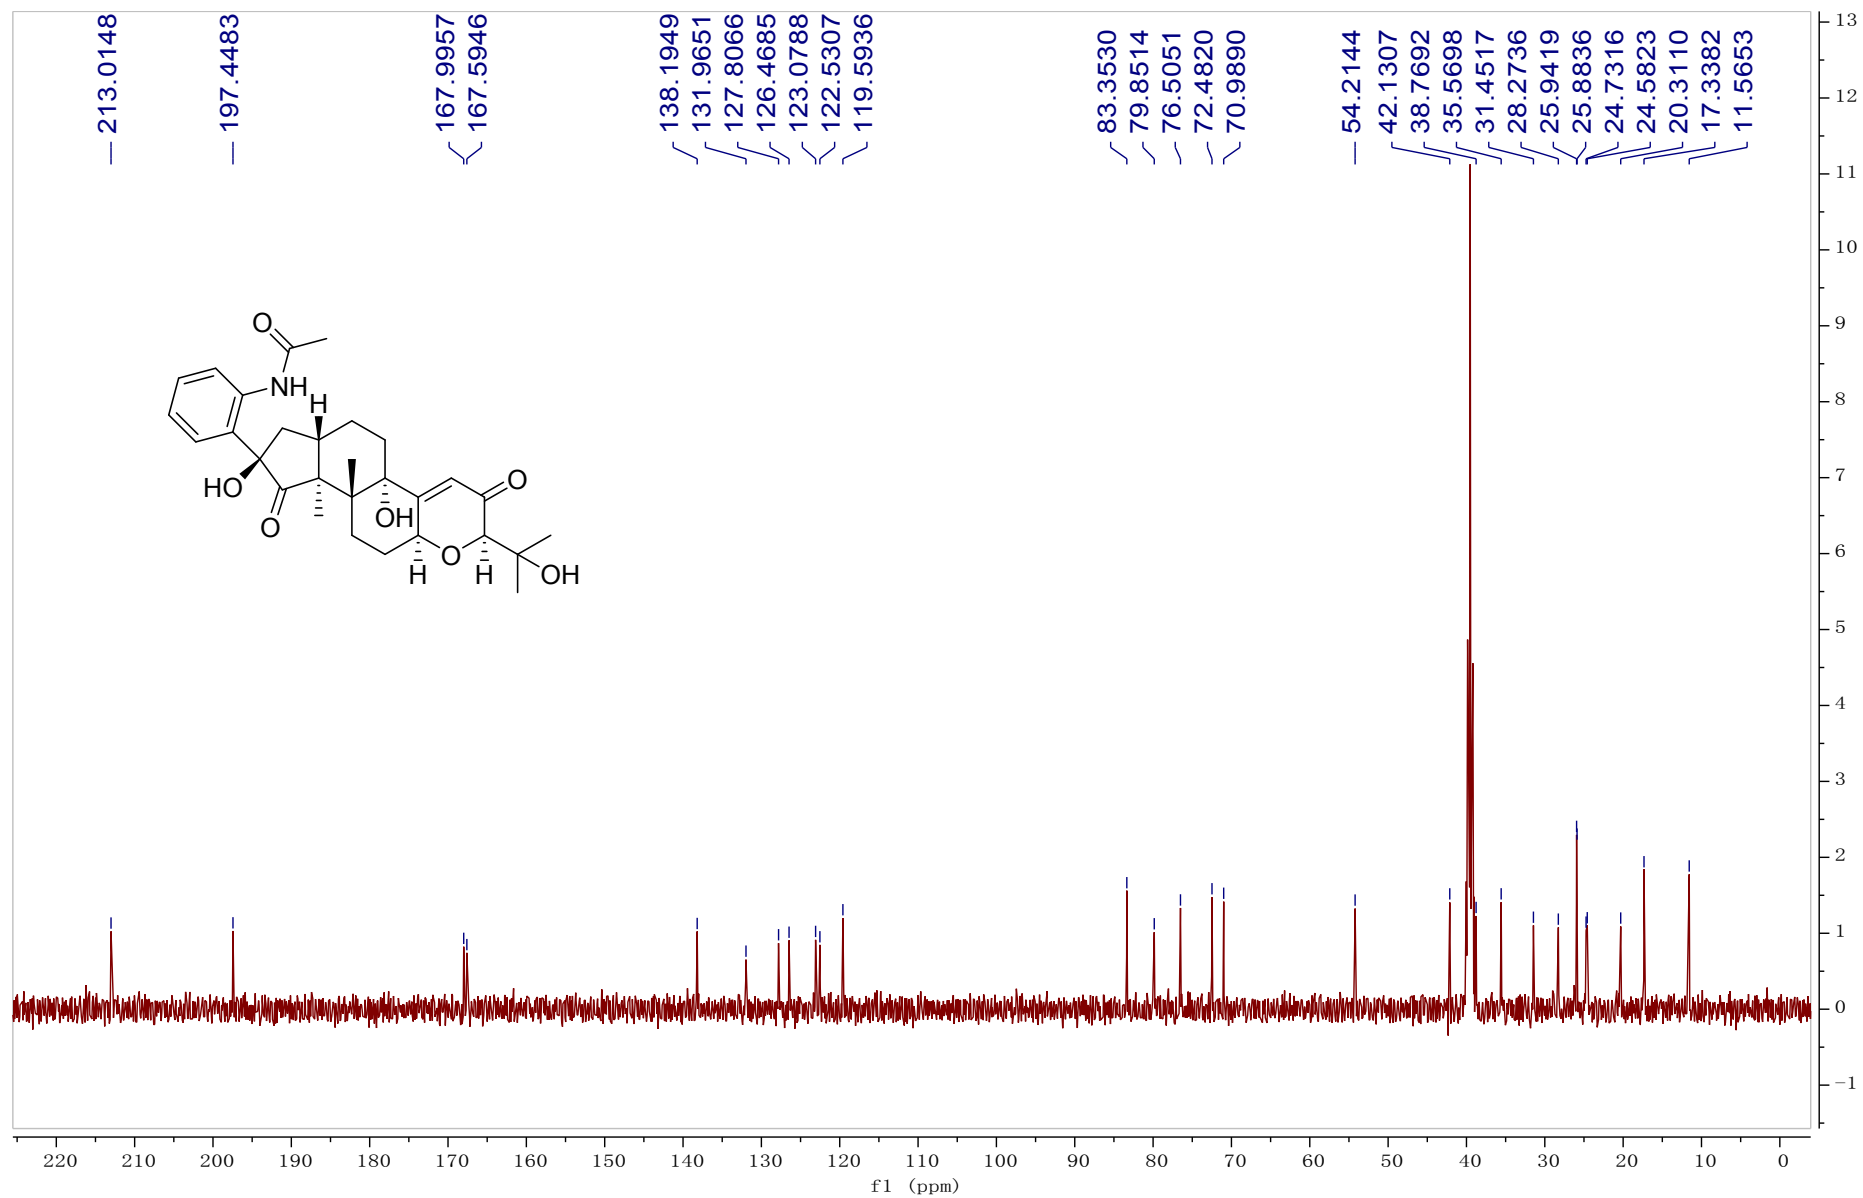

Figure S8. DEPT spectrum of secopaxilline A (**1**) in DMSO- $d_6$

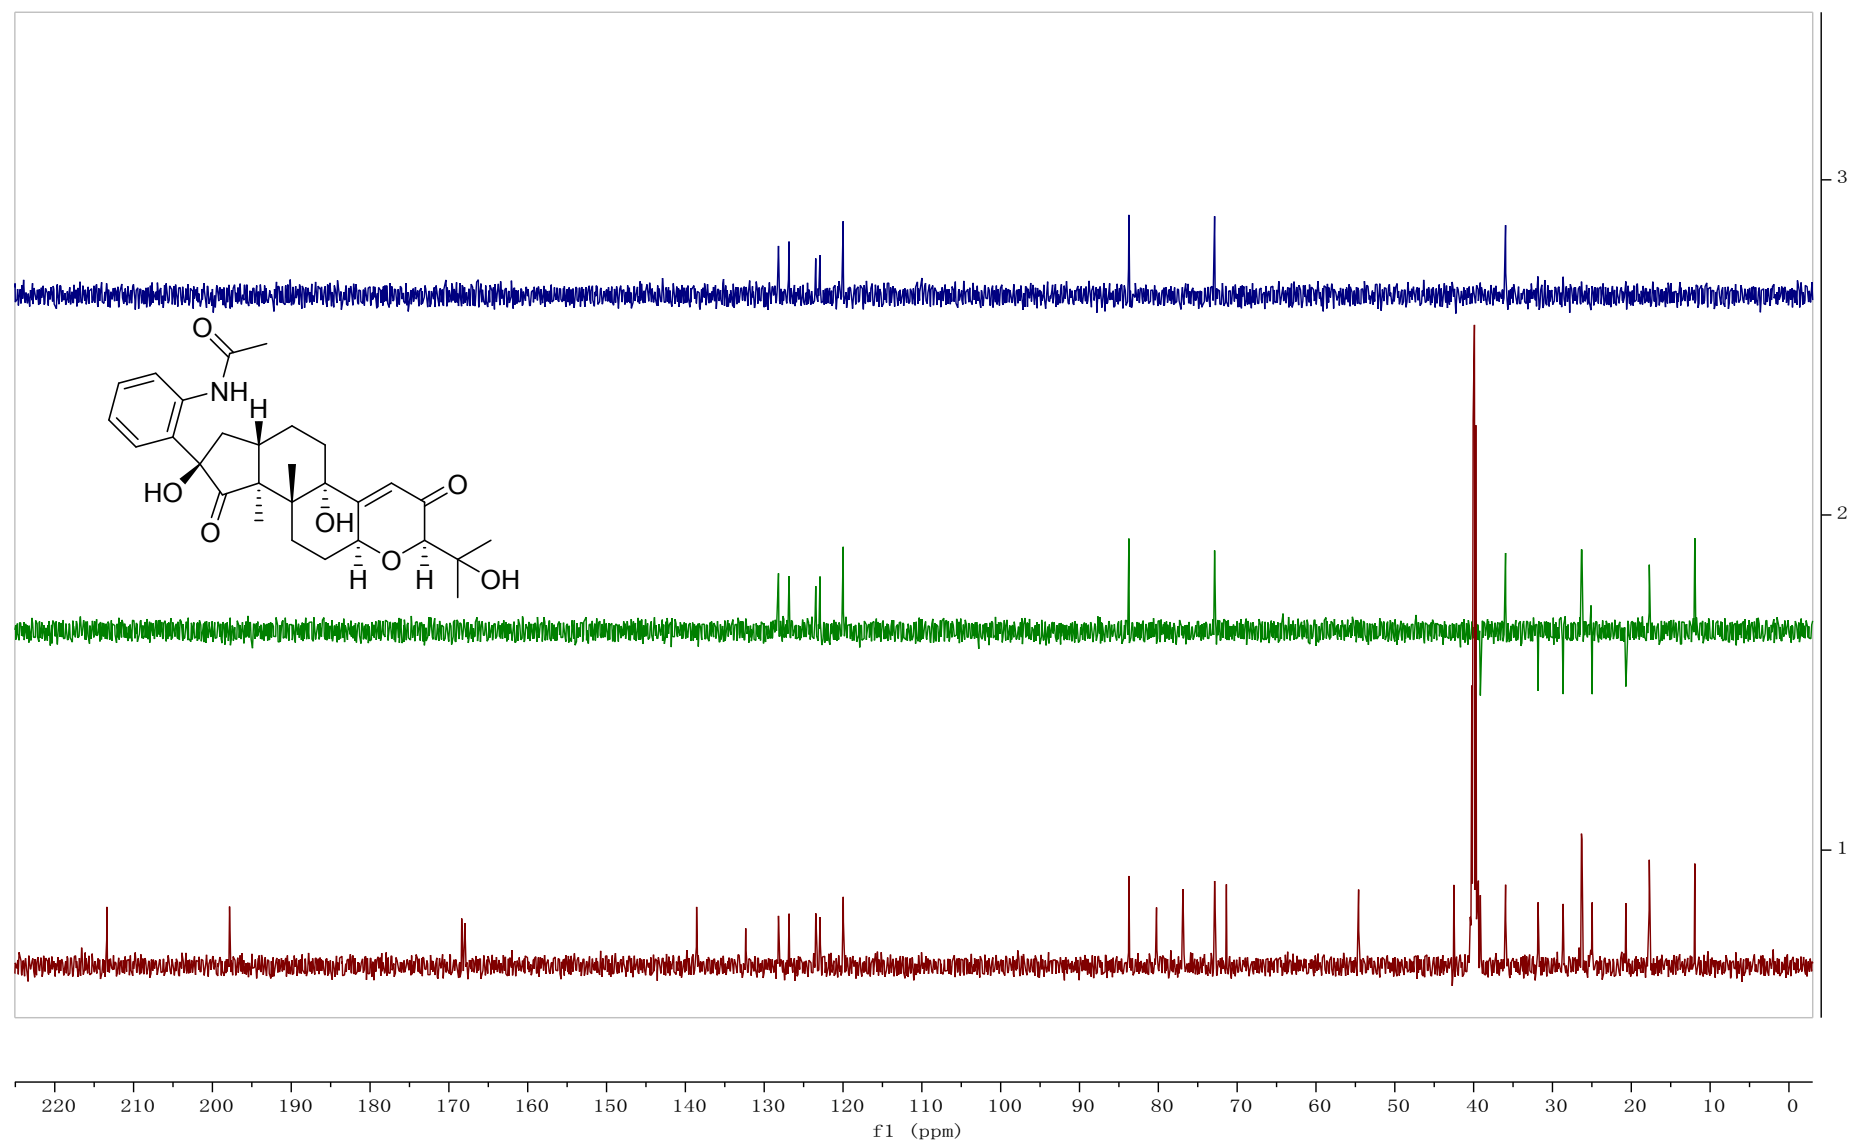



Figure S9. HSQC spectrum of secopaxilline A (**1**) in DMSO- $d_6$

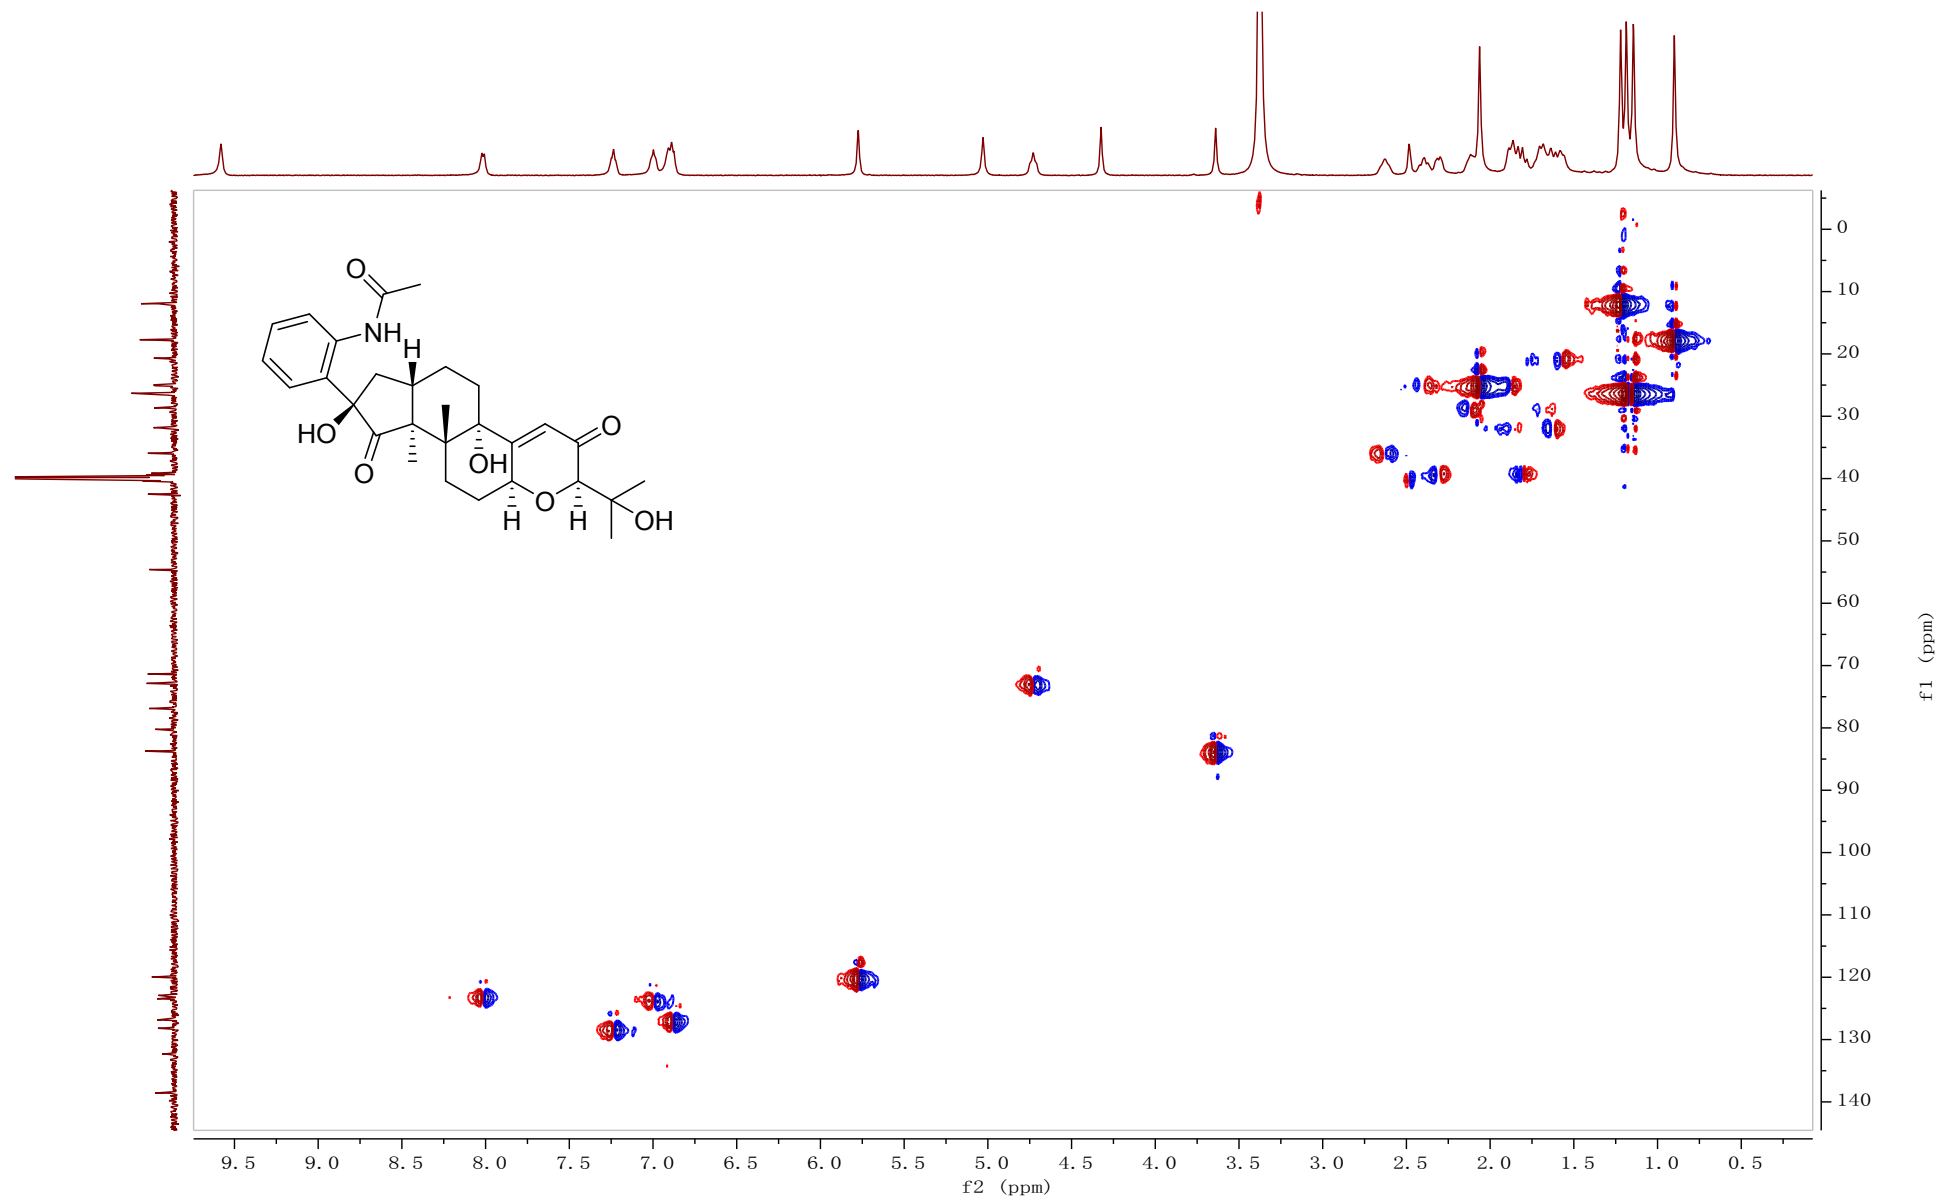

**Figure S10.**  $^1\text{H}$ - $^1\text{H}$  COSY spectrum of secopaxilline A (**1**) in  $\text{DMSO-}d_6$

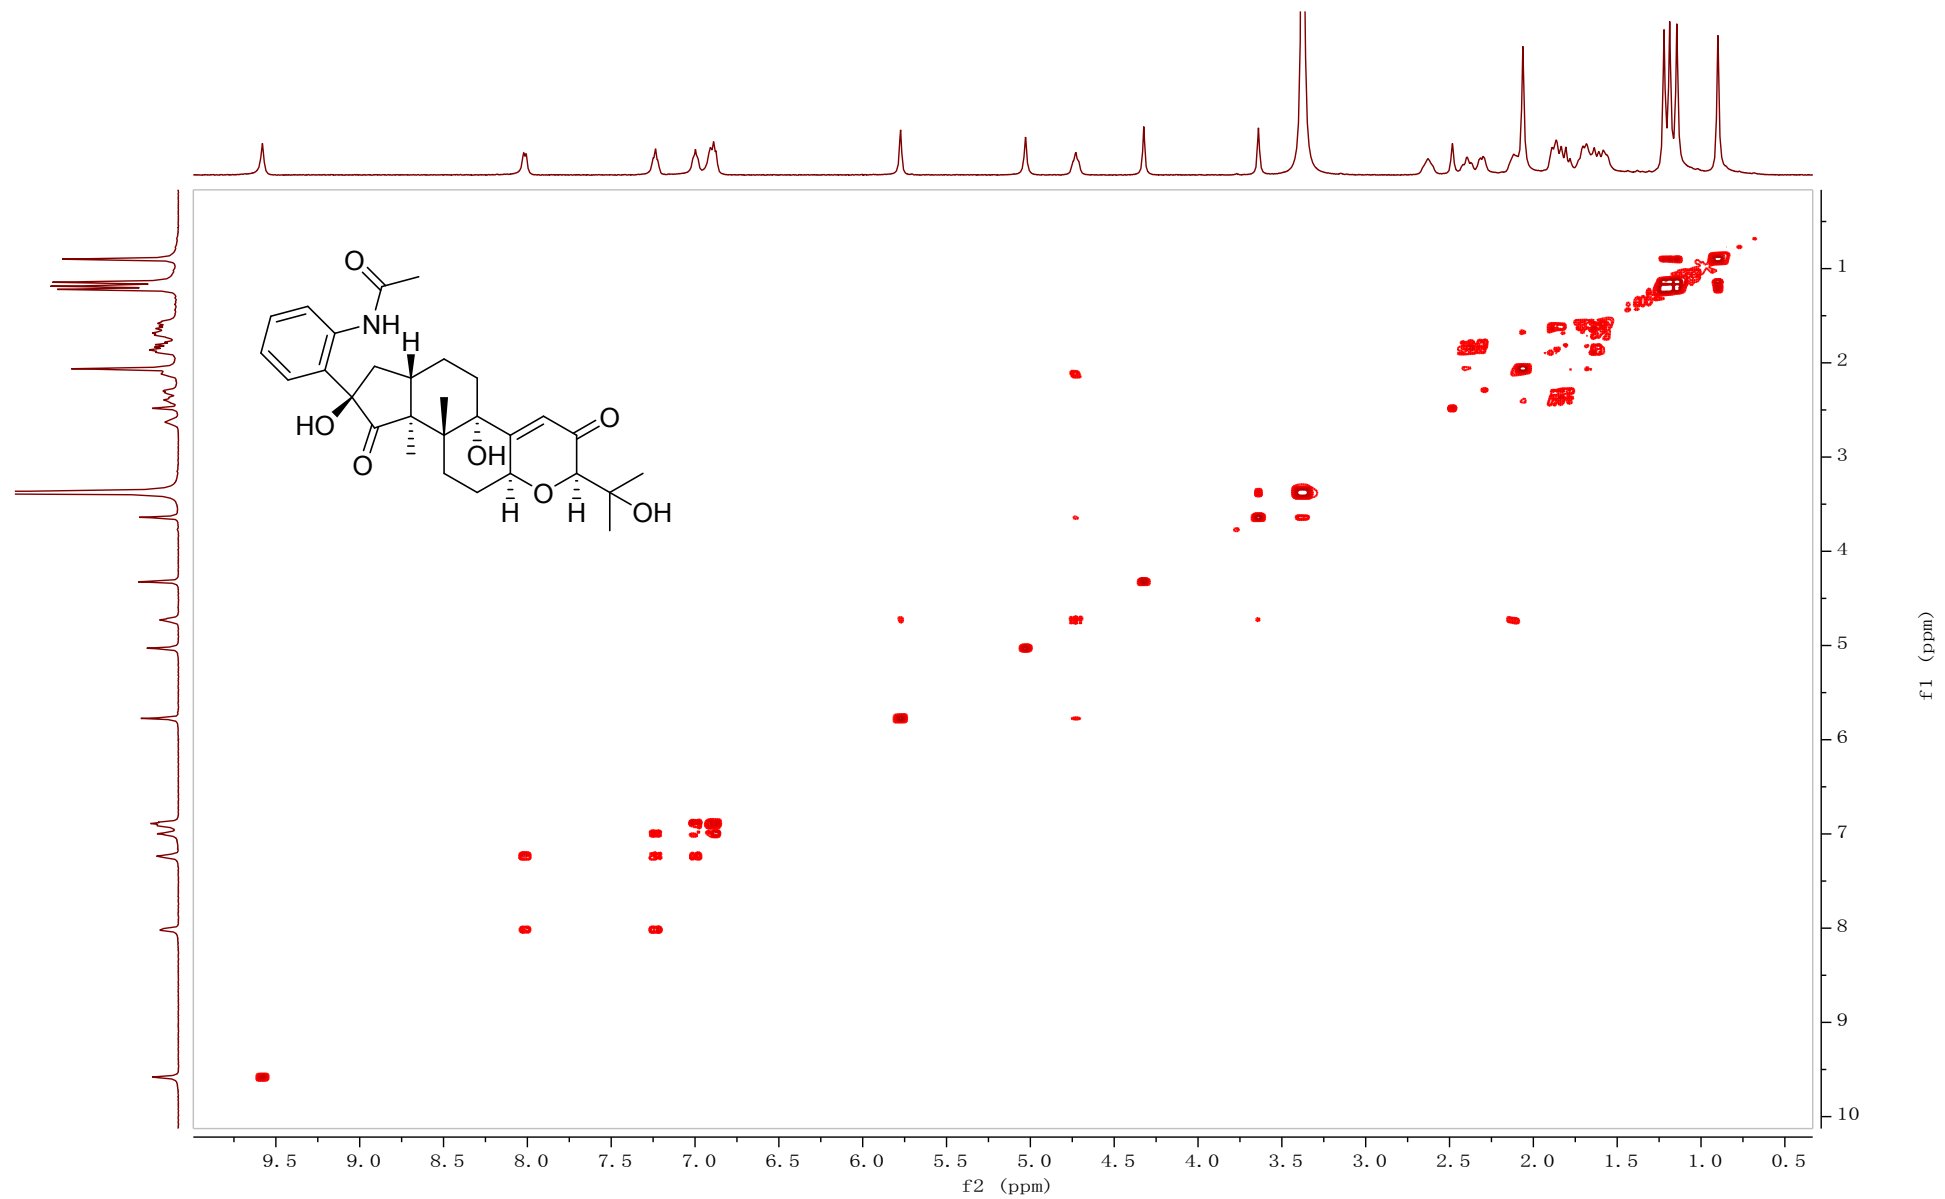

Figure S11. HMBC spectrum of secopaxilline A (1) in DMSO- $d_6$

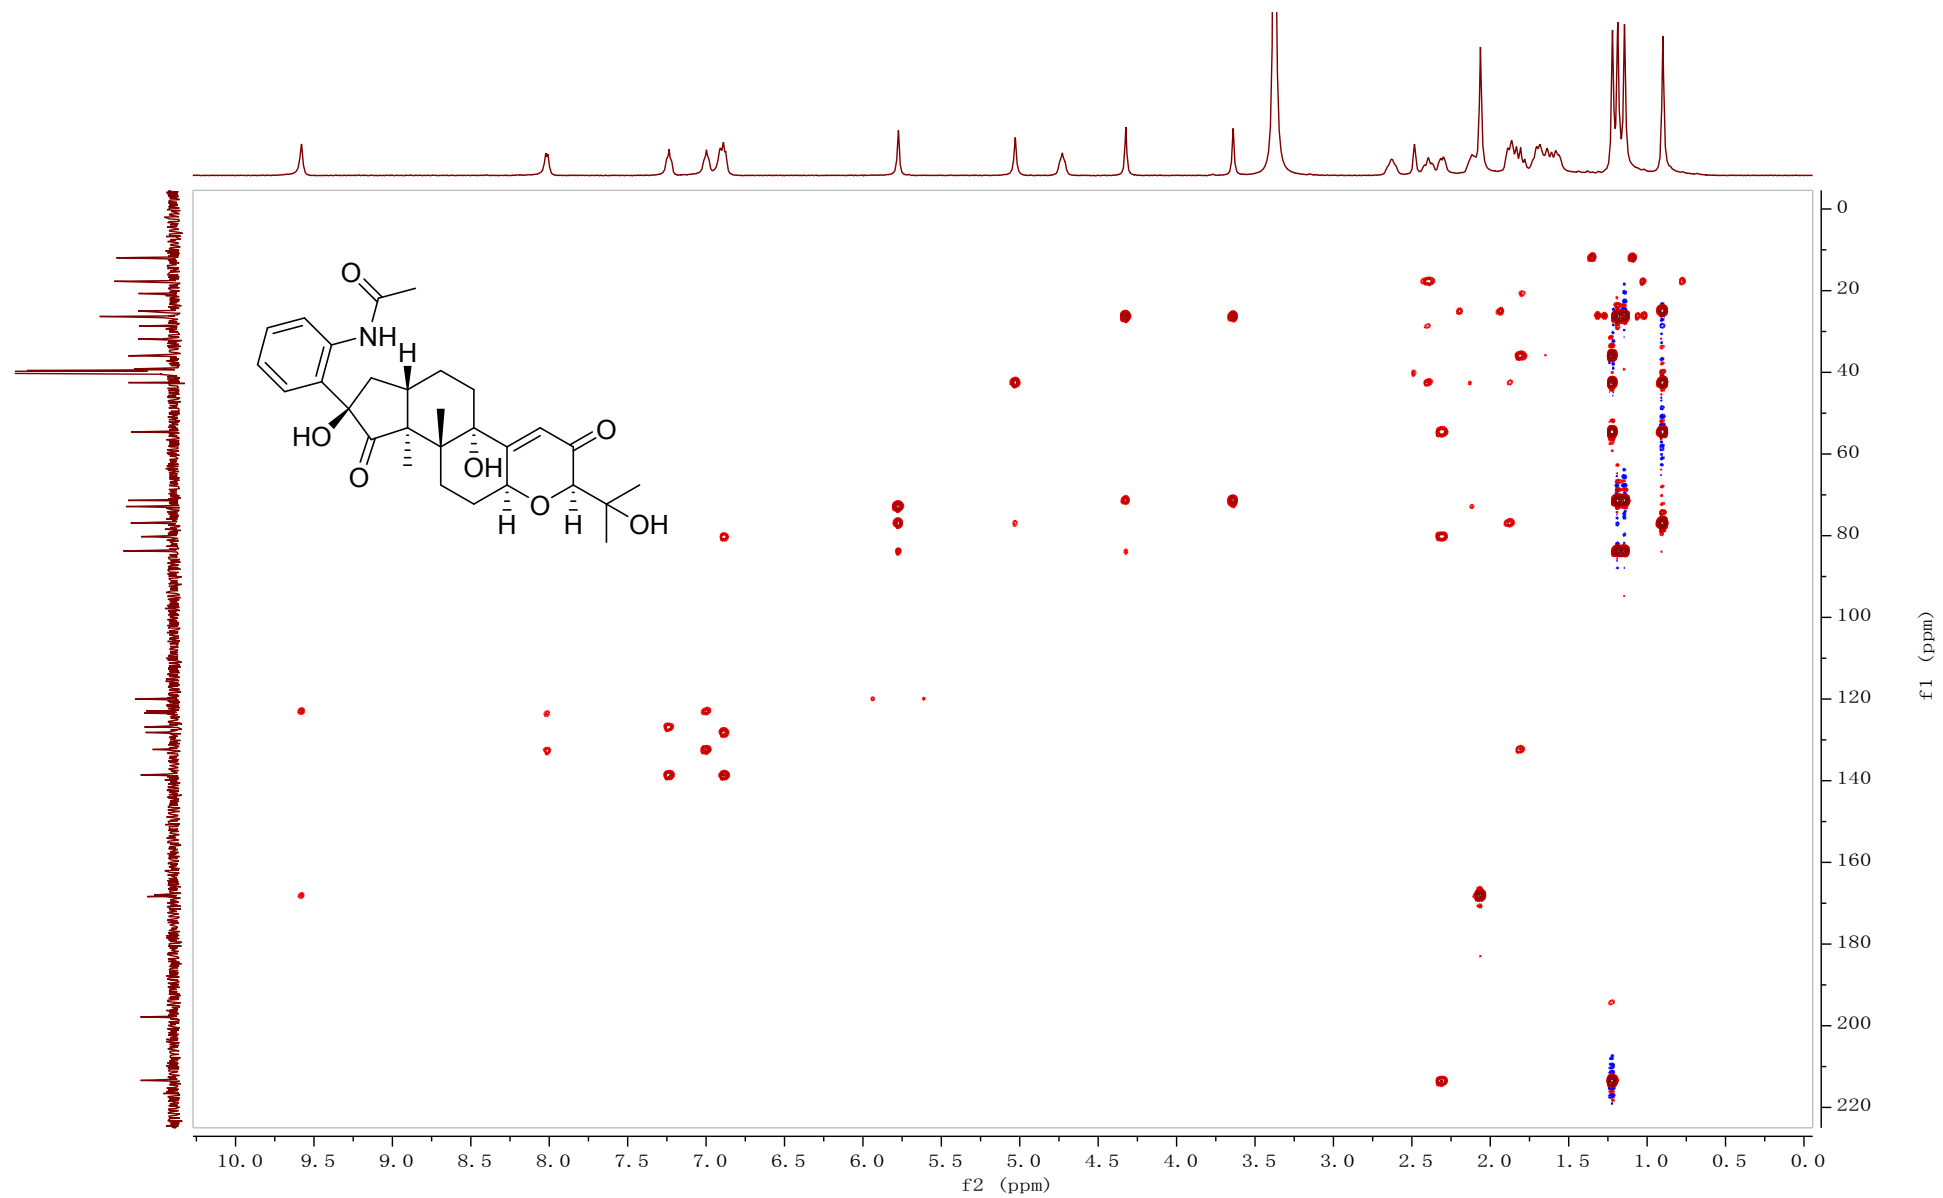

Figure S12. NOESY spectrum of secopaxilline A (1) in DMSO- $d_6$

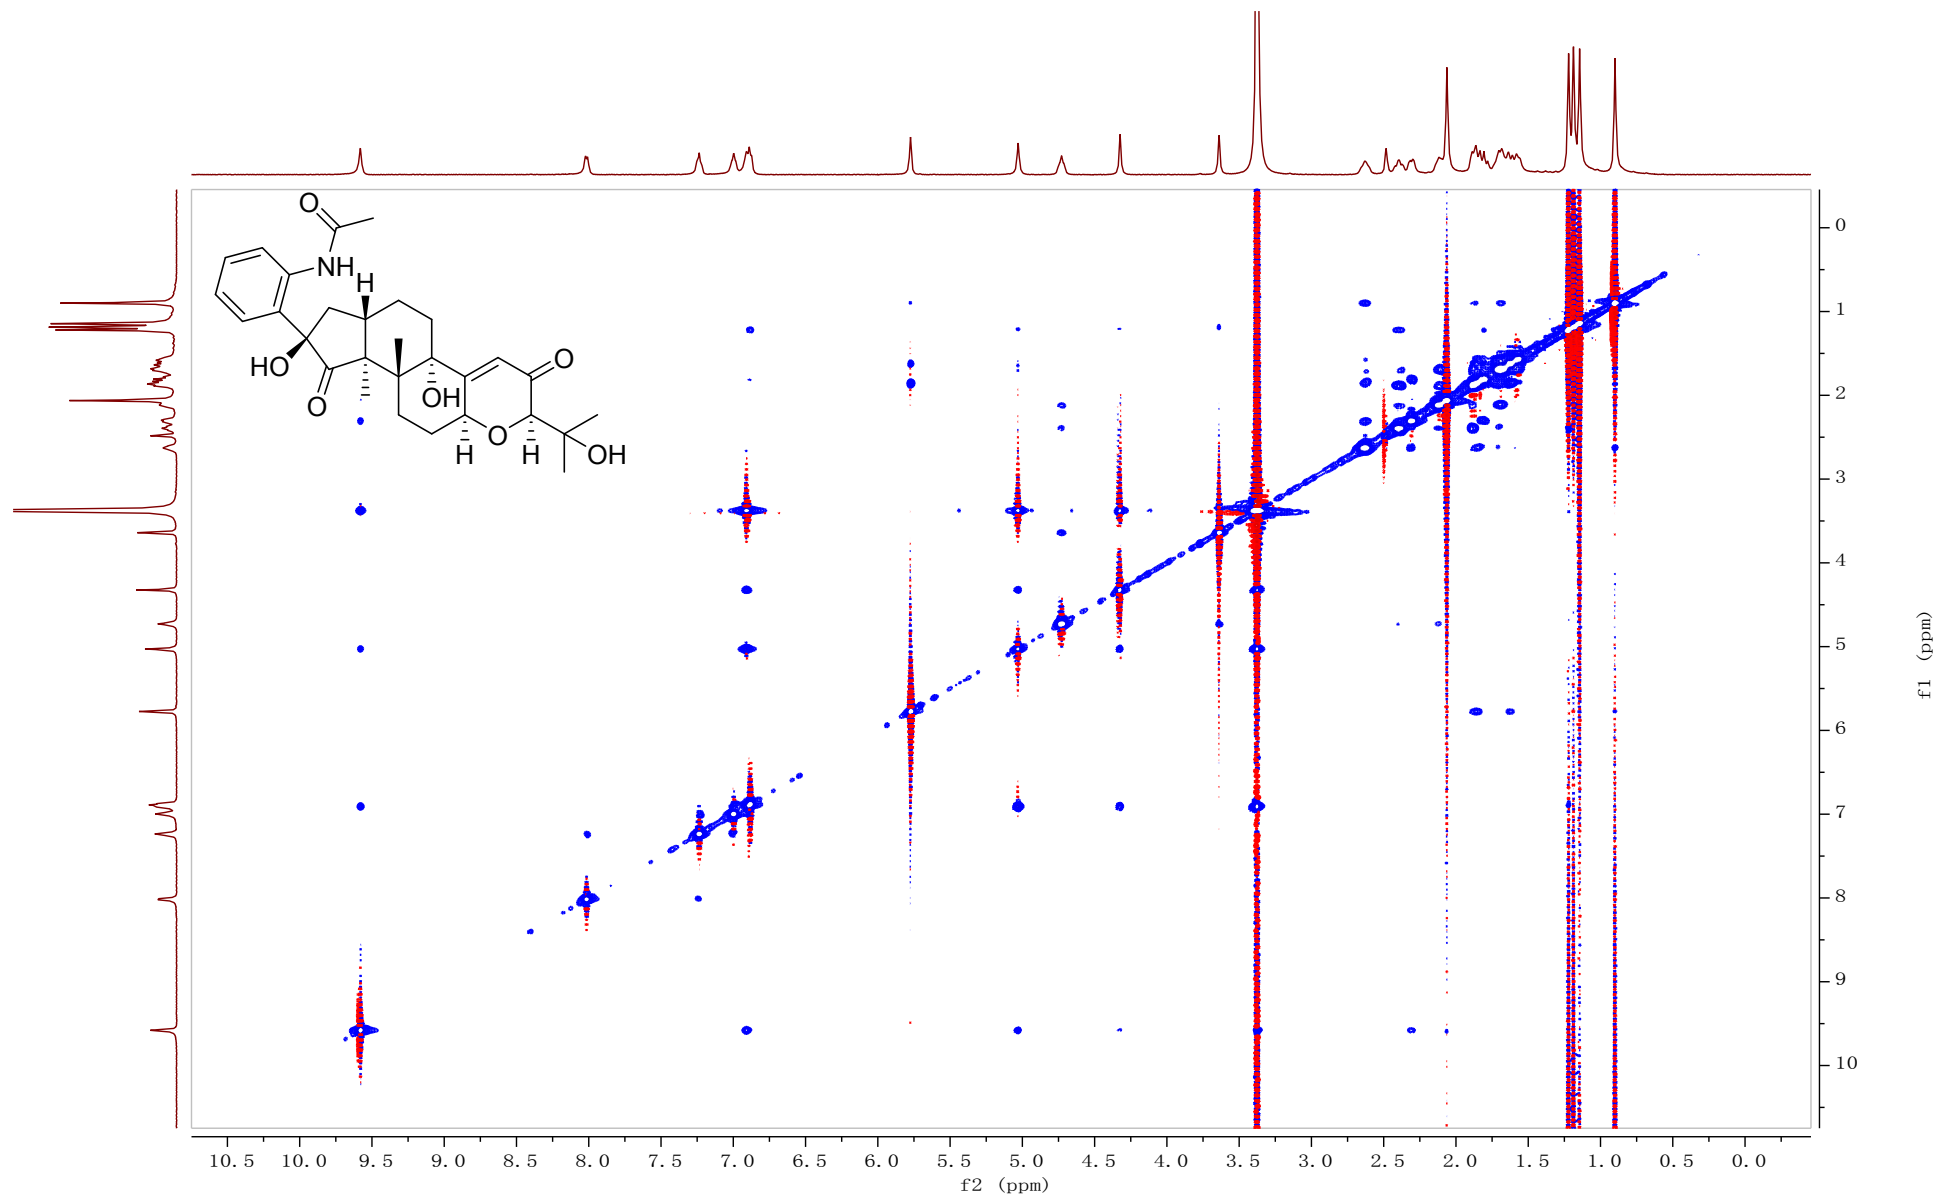

**Figure S13.** HRESIMS spectrum of deacetylsecopaxilline A (4)

20180521-FYQ-10-2-2\_180521110353 #10 RT: 0.08 AV: 1 NL: 4.29E8  
T: FTMS + p ESI Full ms [170.00-2000.00]

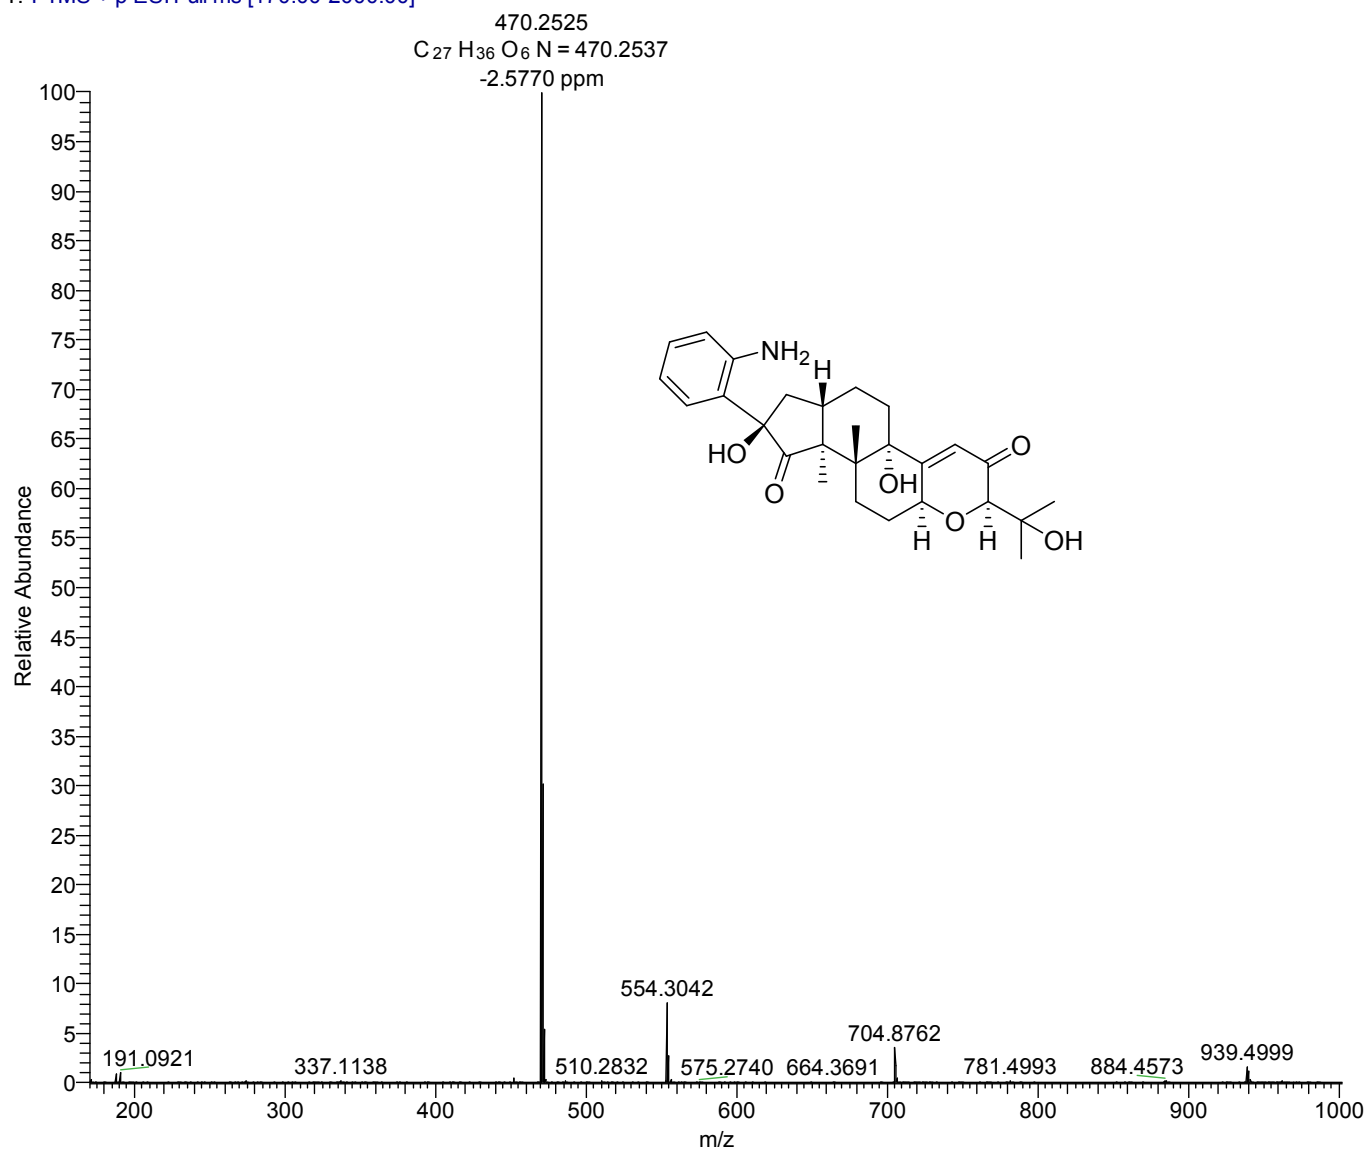

Figure S14. <sup>1</sup>H-NMR spectrum of deacetylsecopaxilline A (4) in DMSO-*d*<sub>6</sub>

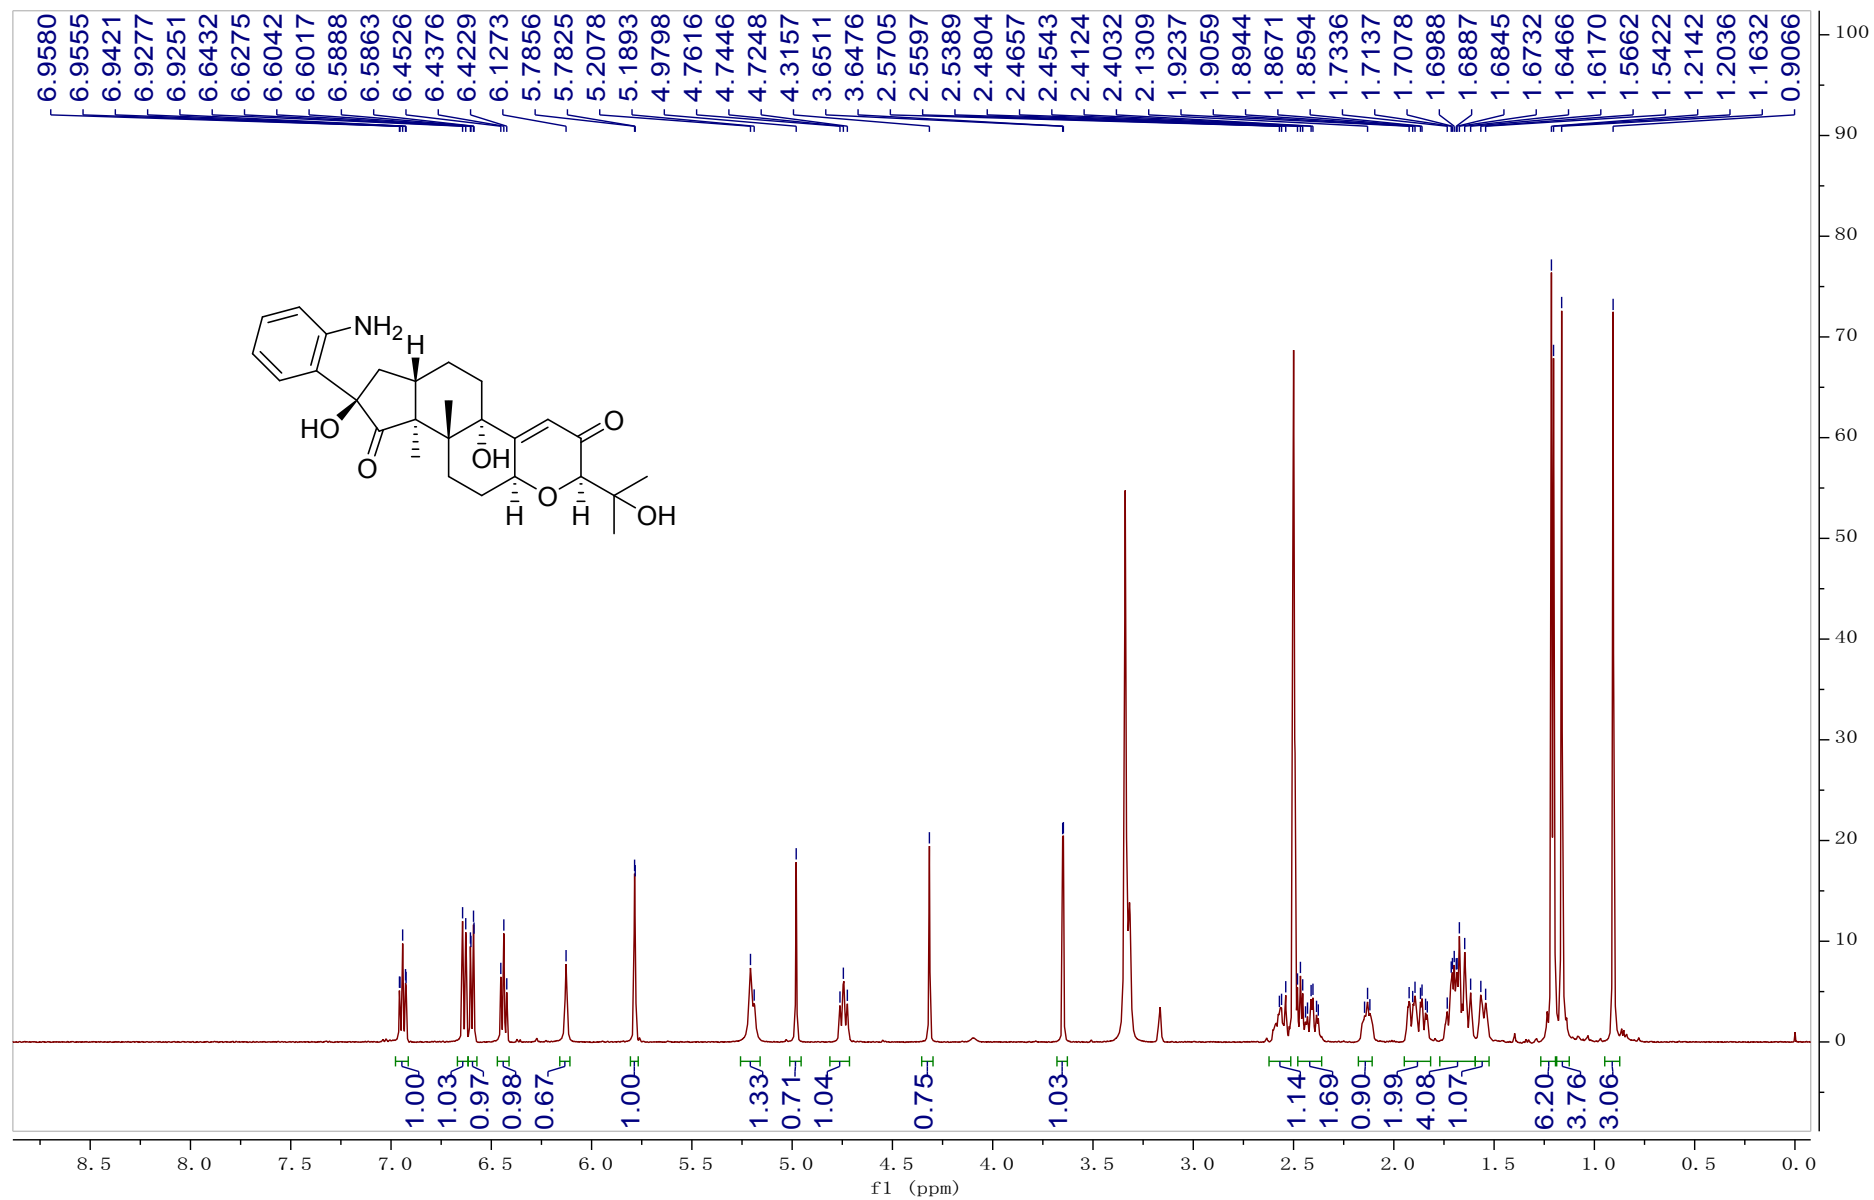

Figure S15.  $^{13}\text{C}$ -NMR spectrum of deacetylsecopaxilline A (**4**) in  $\text{DMSO-}d_6$

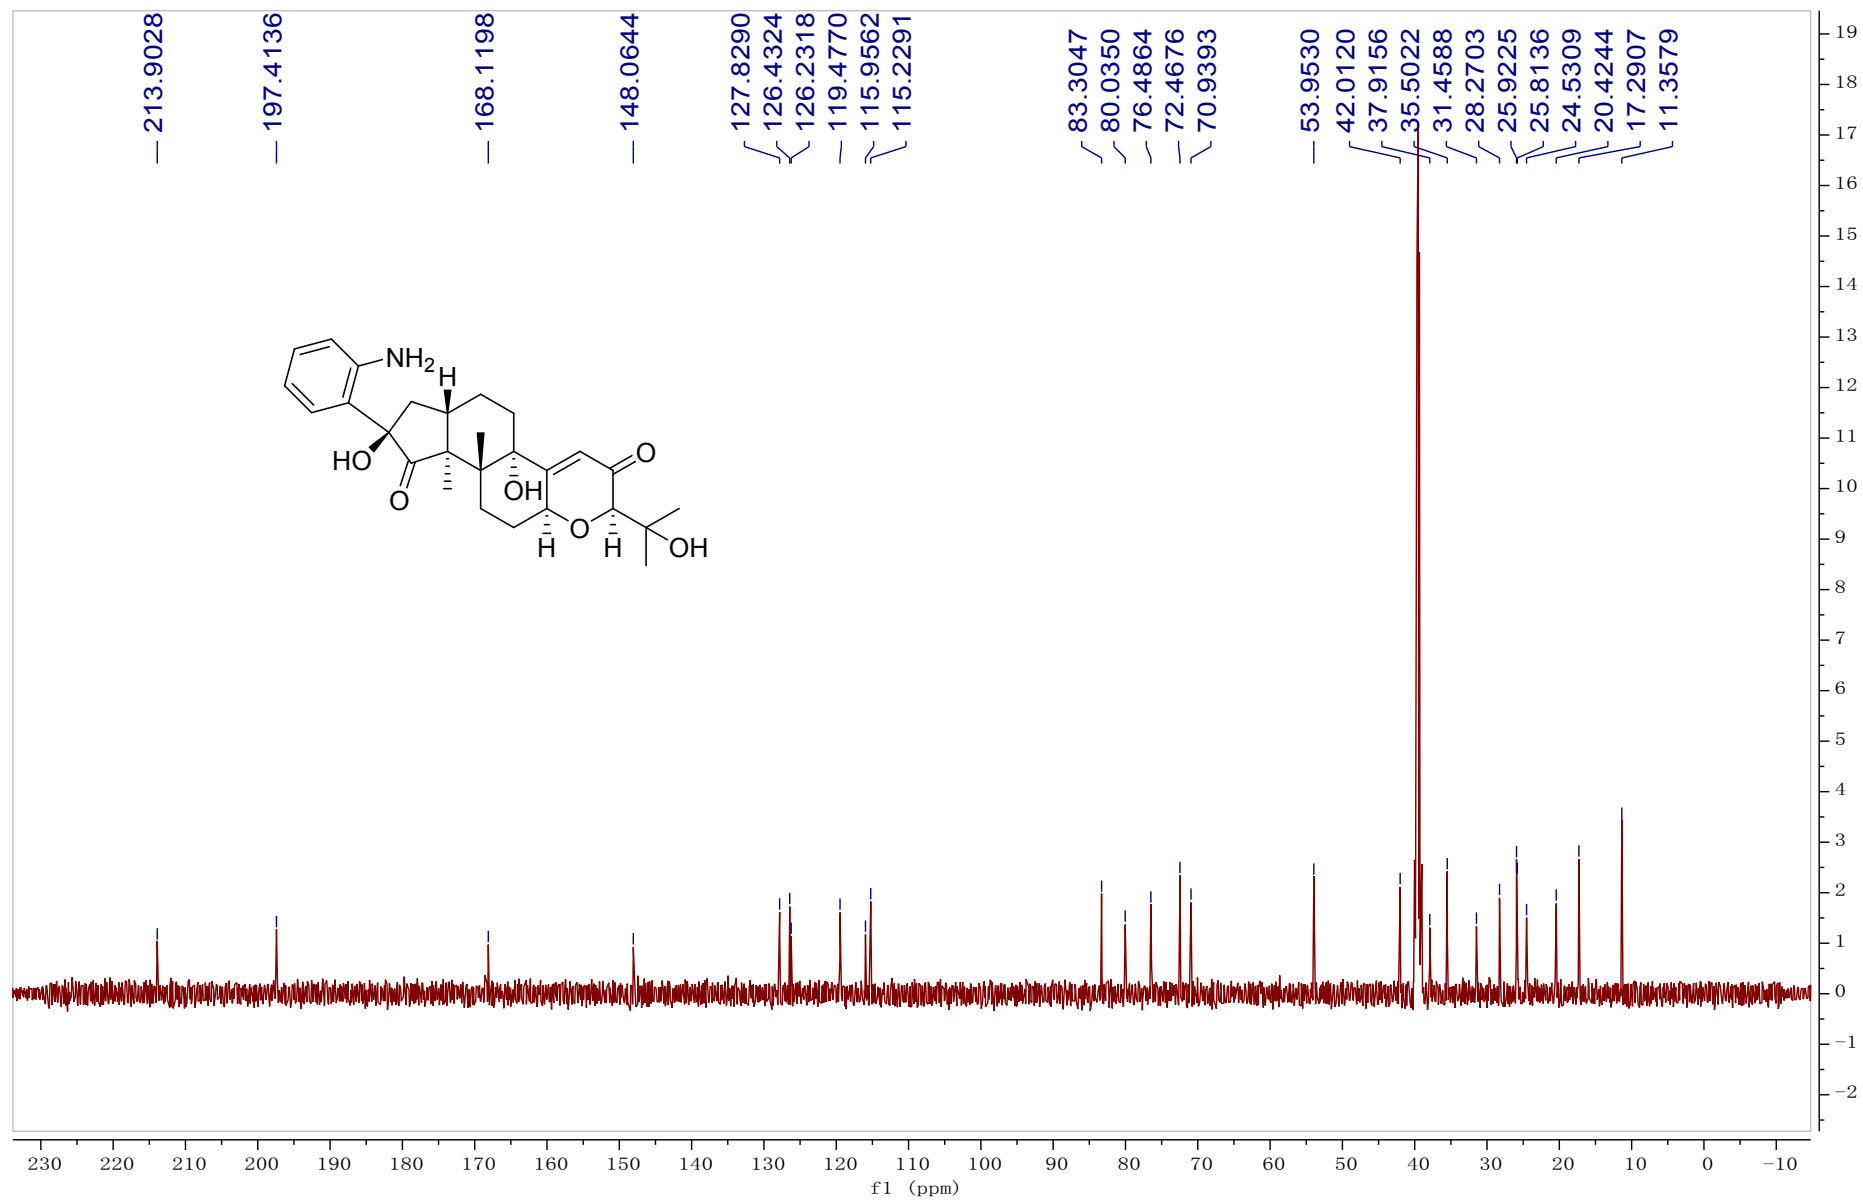

Figure S16. HSQC spectrum of deacetylsecopaxilline A (4) in DMSO- $d_6$

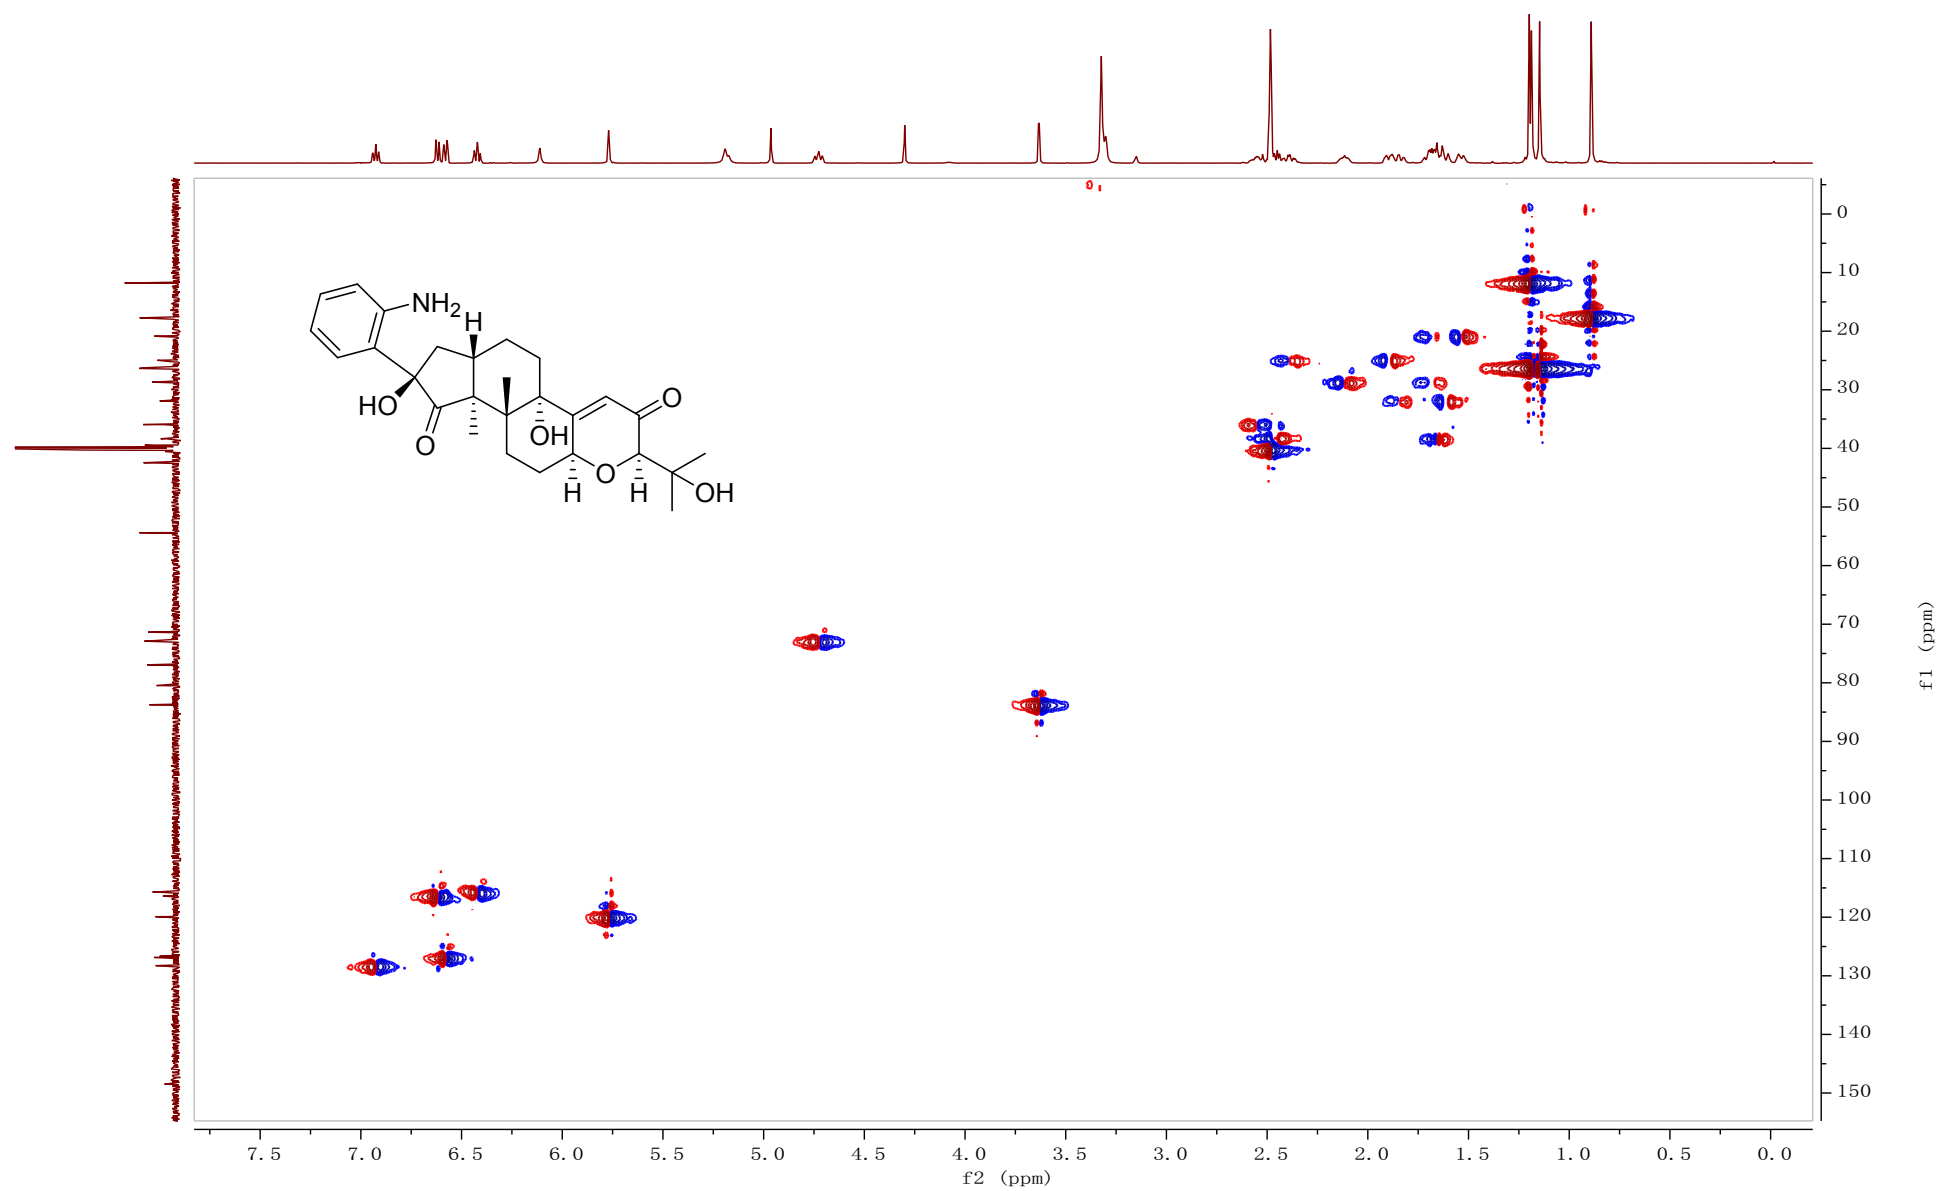



**Figure S17.**  $^1\text{H}$ - $^1\text{H}$  COSY spectrum of deacetylsecopaxilline A (**4**) in  $\text{DMSO-}d_6$

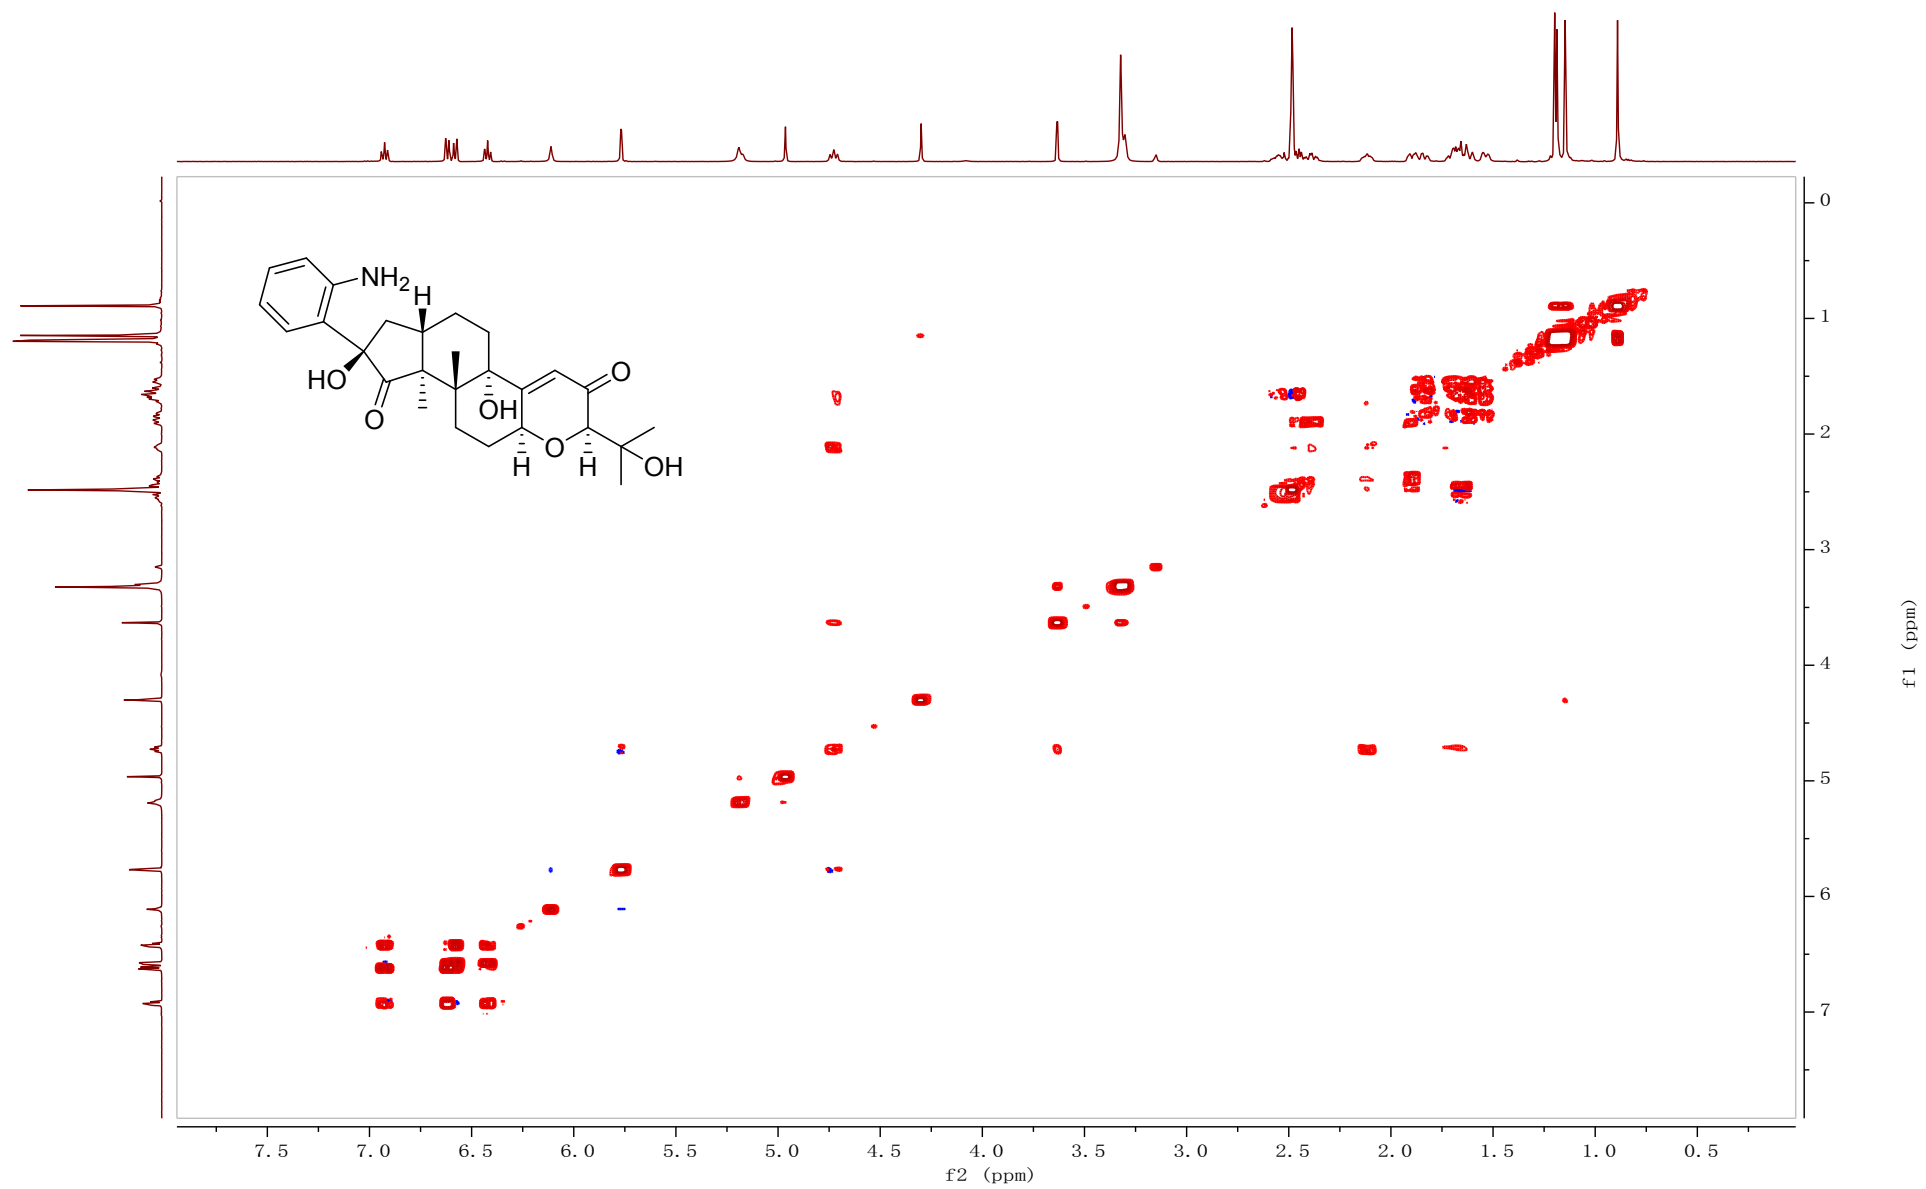

Figure S18. HMBC spectrum of deacetylsecopaxilline A (4) in DMSO- $d_6$

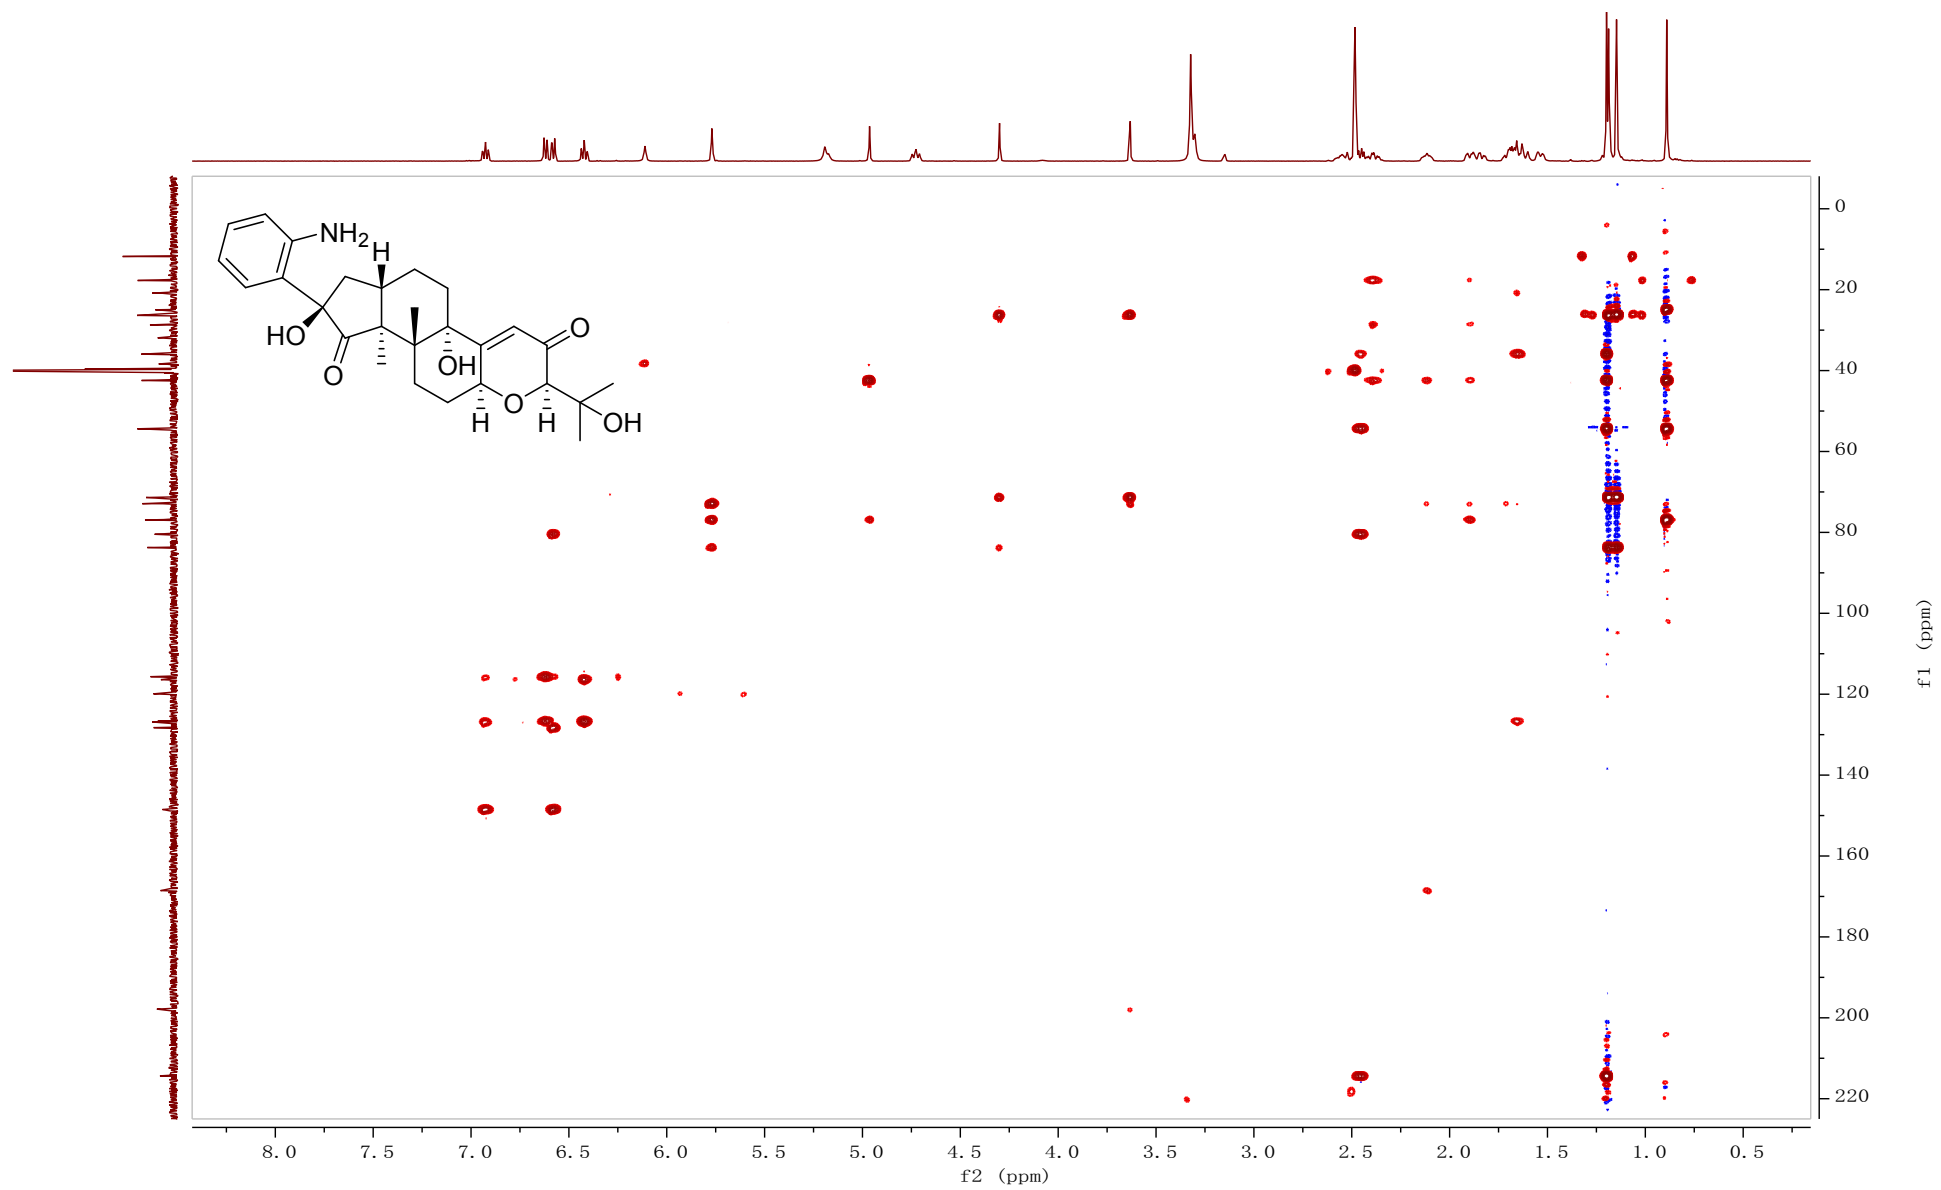

Figure S19. NOESY spectrum of deacetylsecopaxilline A (4) in DMSO- $d_6$

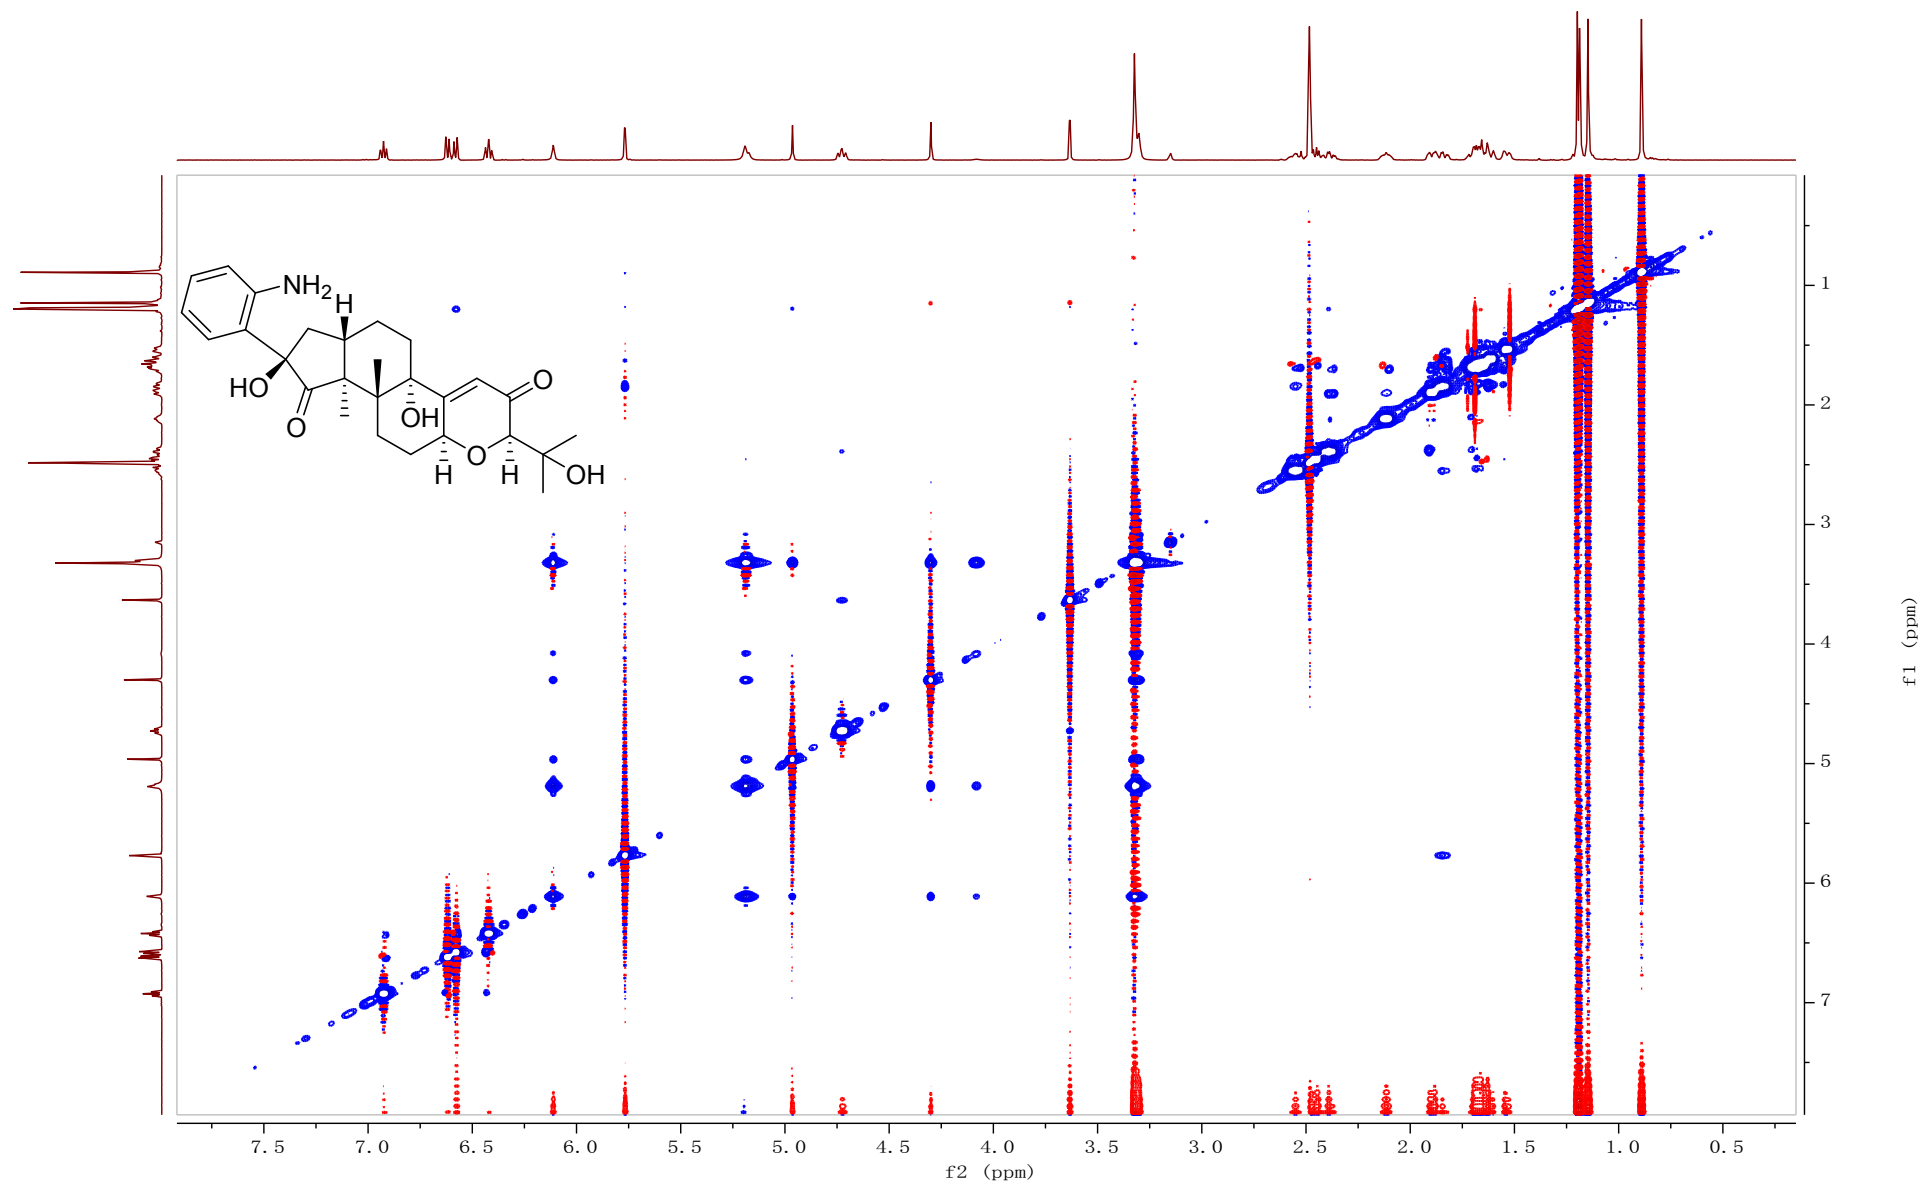

**Figure S20.** Comparison of the  $^1\text{H}$ -NMR of the isolated and synthetic secopaxilline A (**1**)

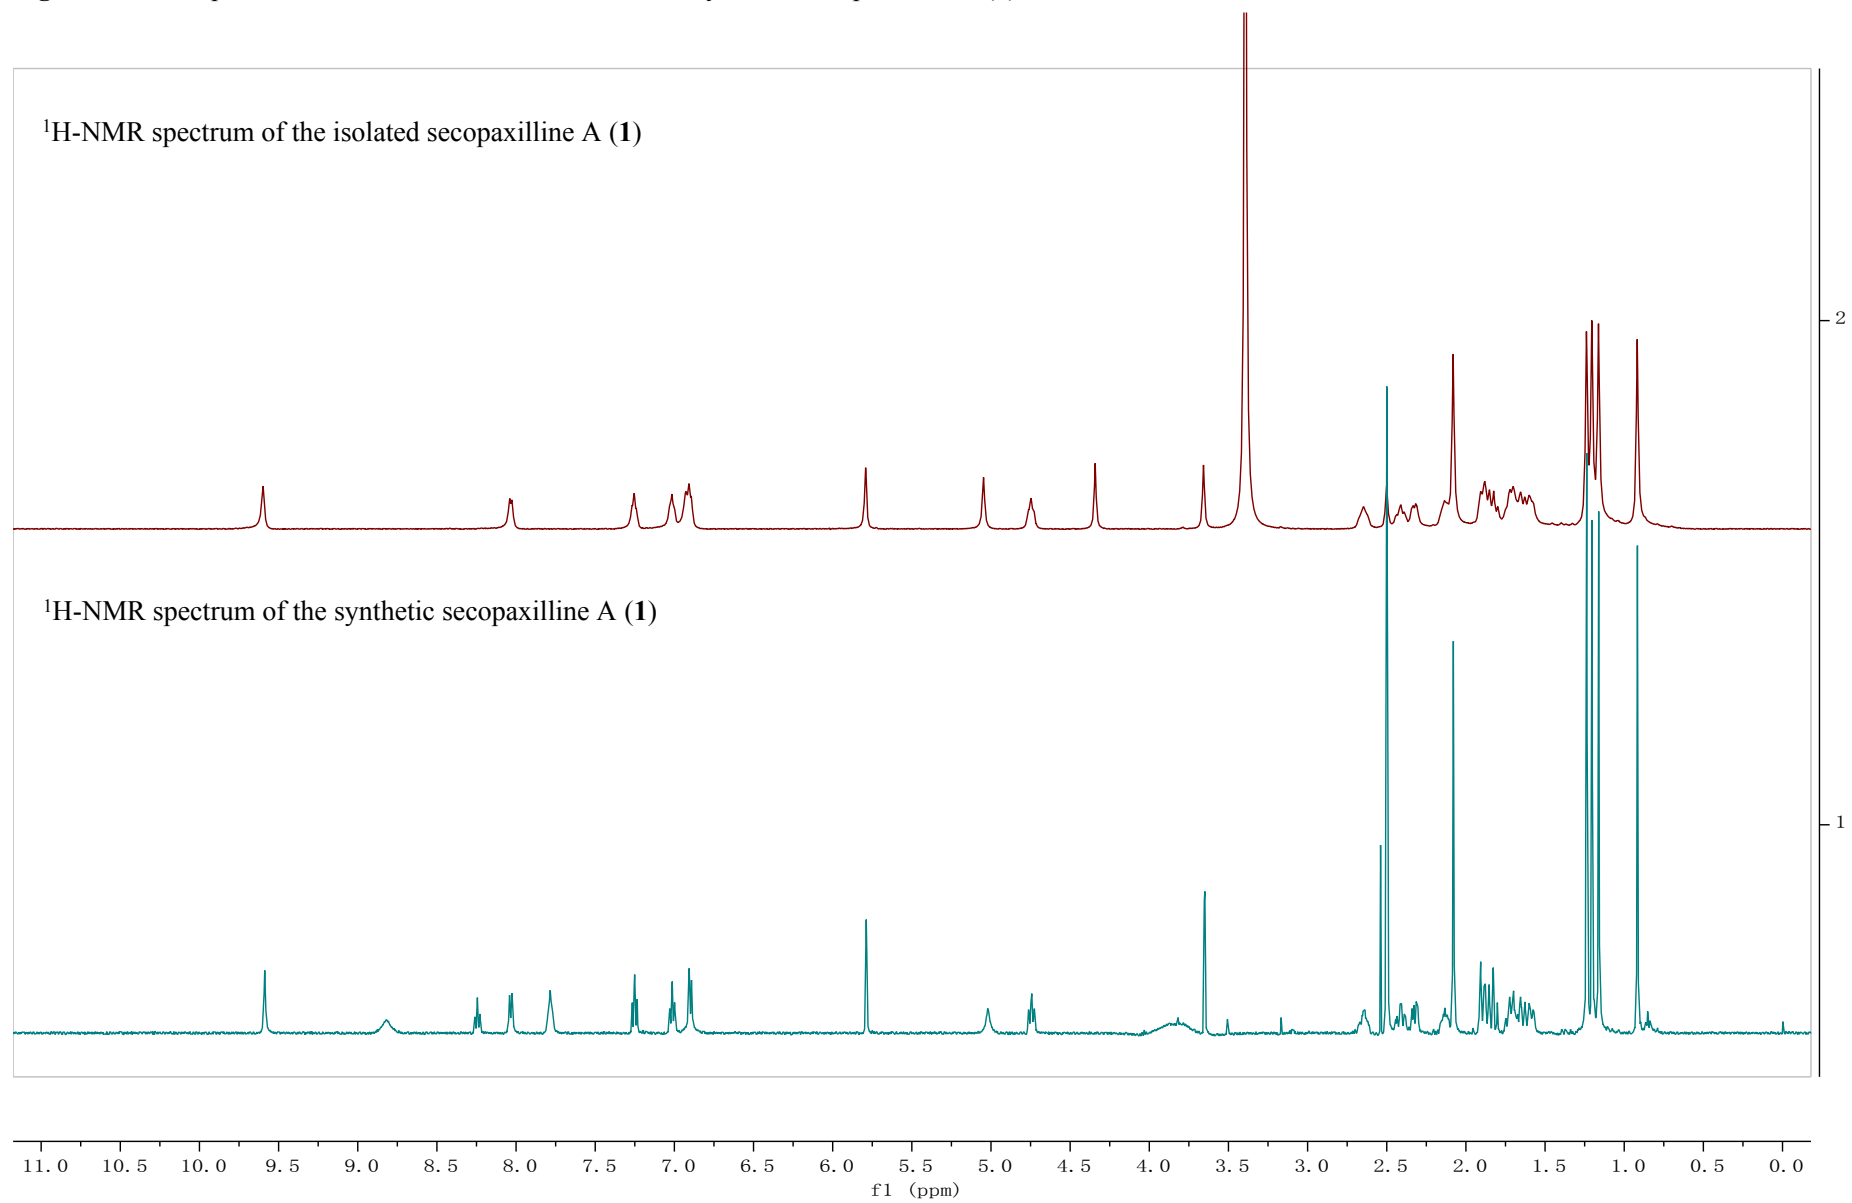

**Figure S21.** UV spectrum of secopaxilline A (1) and deacetylsecopaxilline A (4)

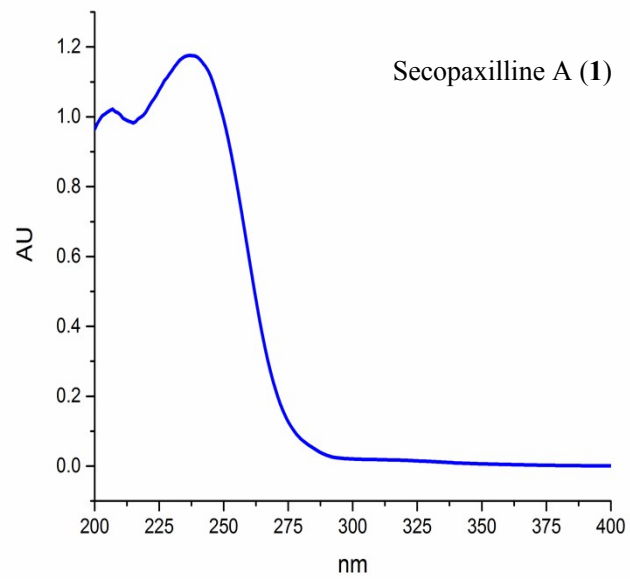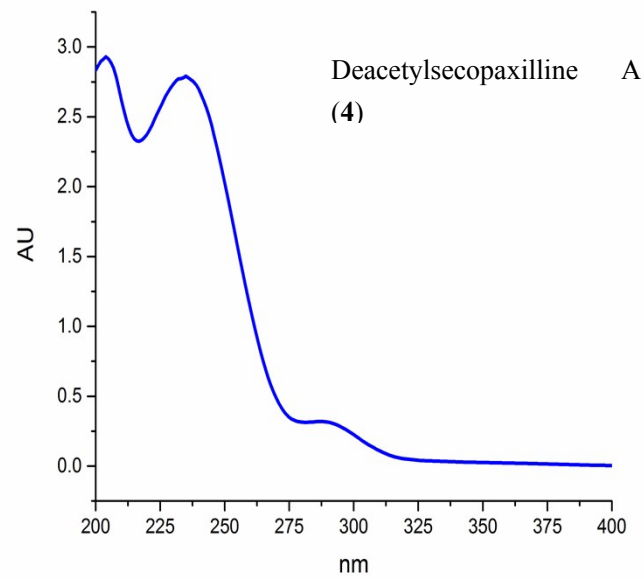

Figure S22. IR spectrum of secopaxilline A (1)

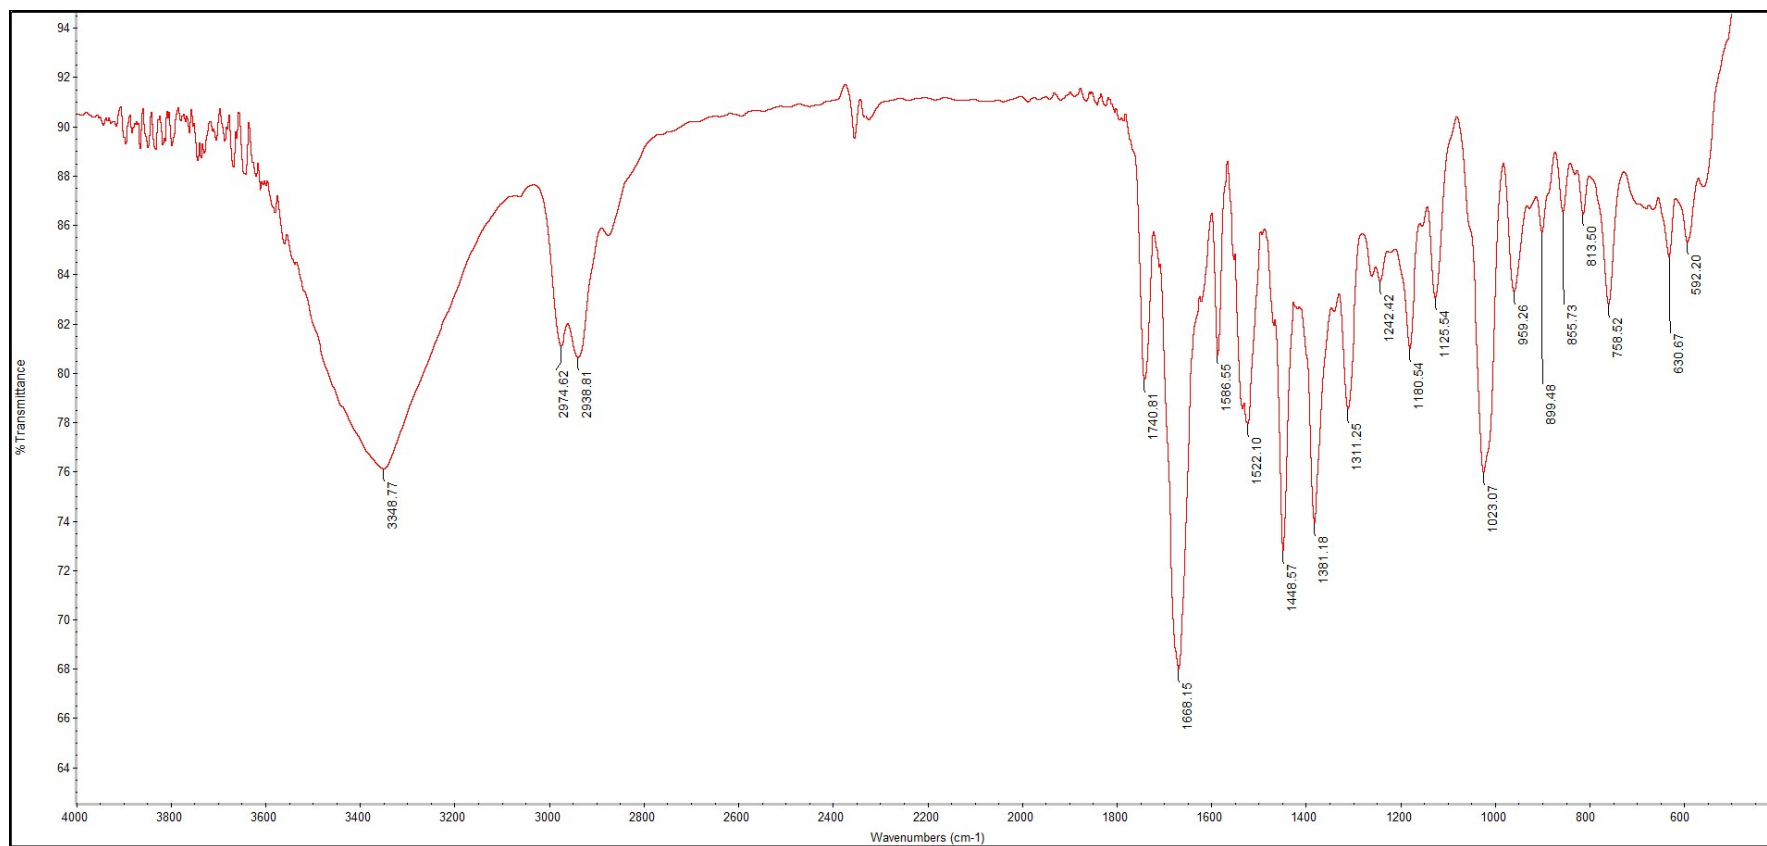

Figure S23. IR spectrum of deacetylsecopaxilline A (4)

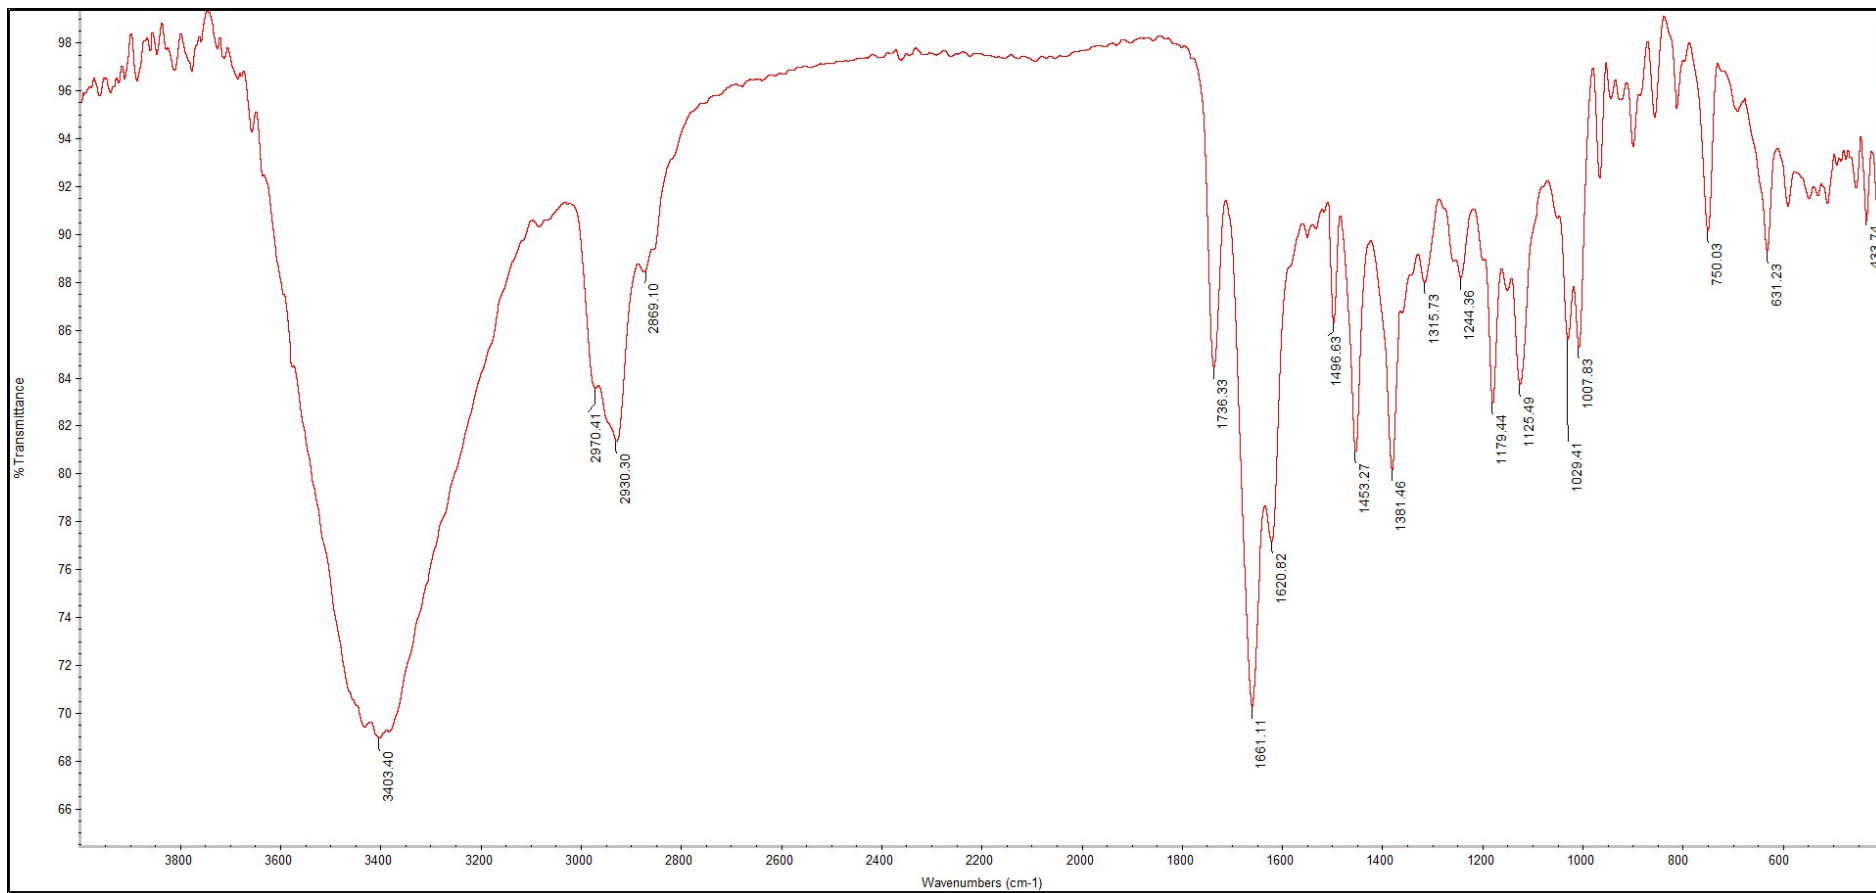

Supplement: c8qo00756j1.pdf [file c8qo00756j1.pdf]
